# Supplementary material
Source: publisher site journal article supplement (https://www.dovepress.com/article/612305)
Supplement: Supplementary file 1 [file 612305%20Supplementary%20Material.docx]

**Supplementary Figure**


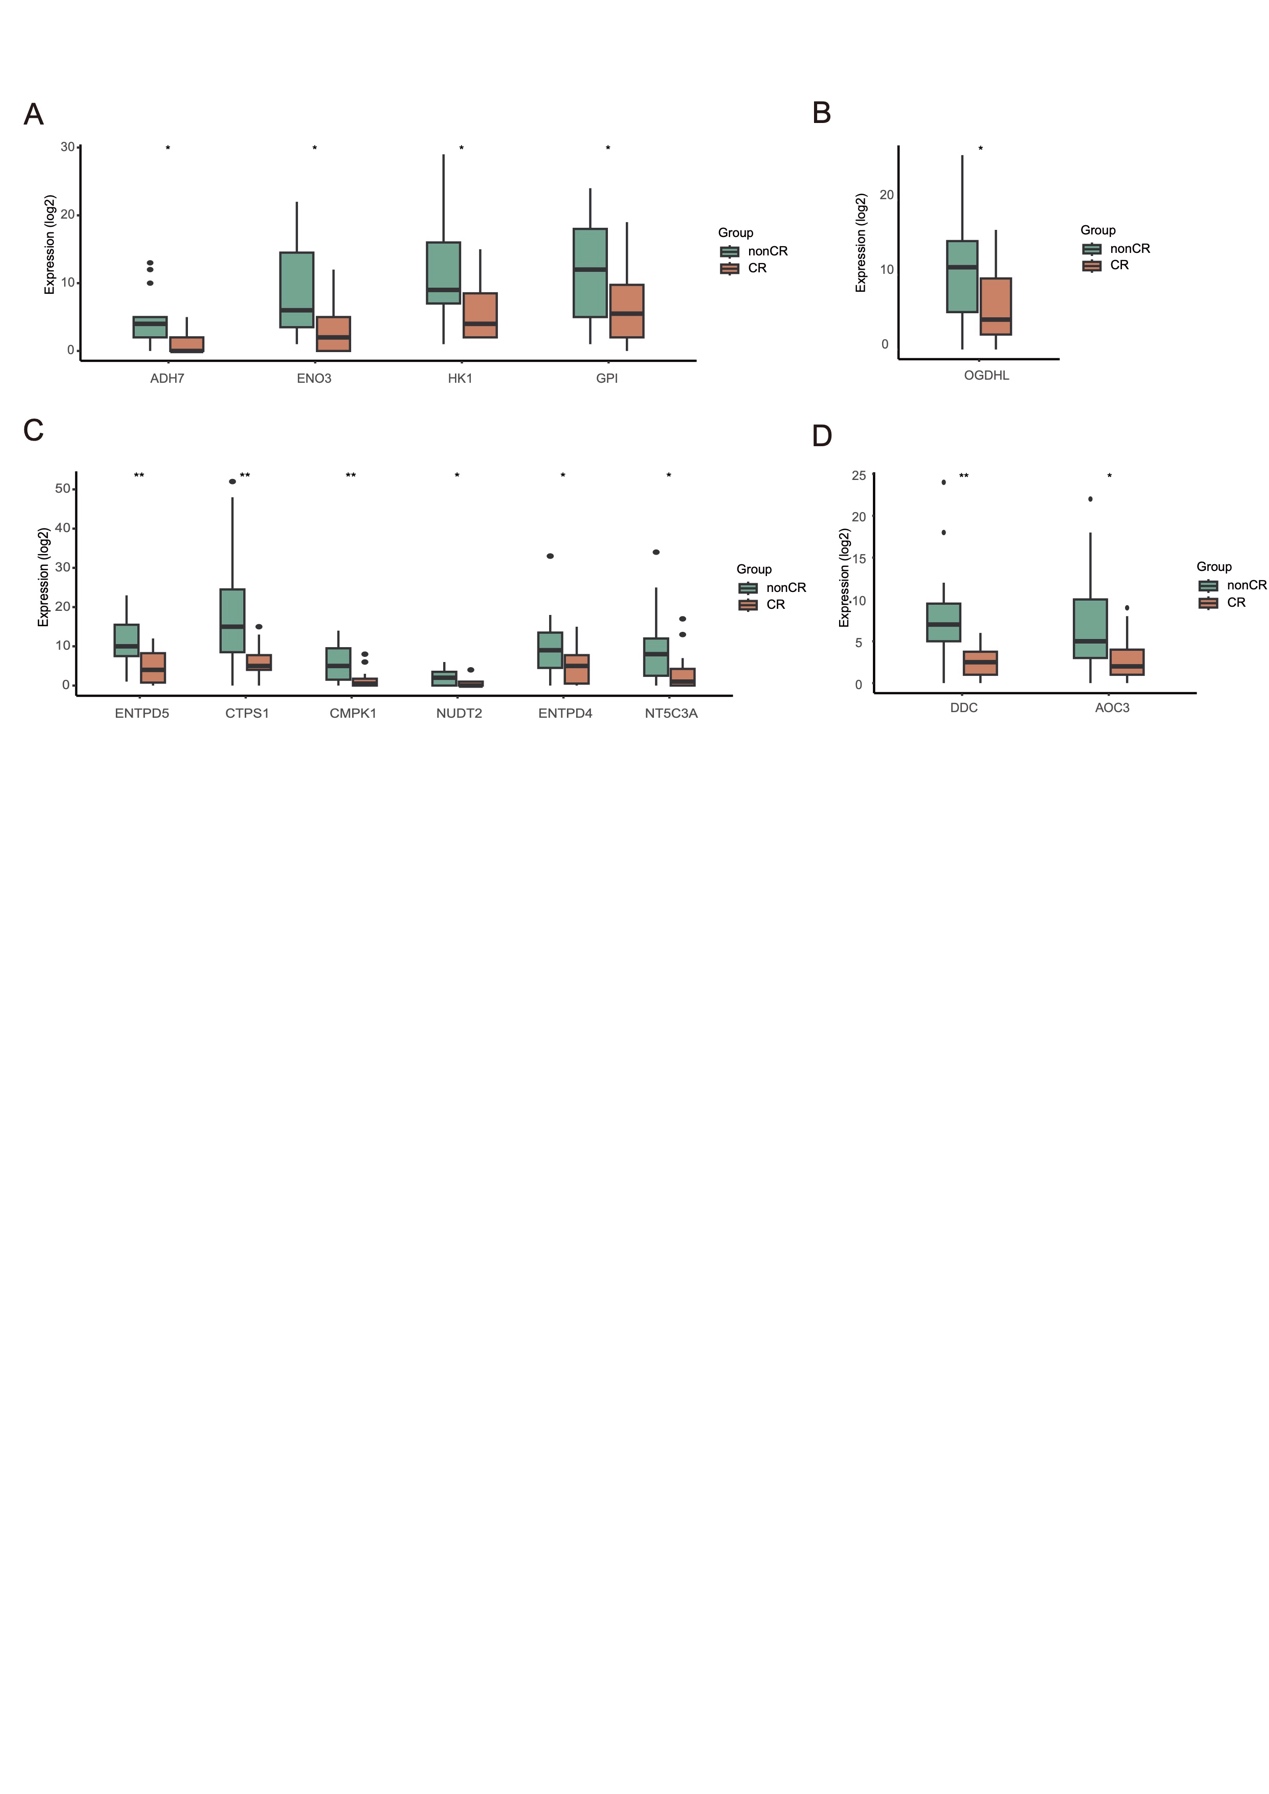


Supplementary Figure 1: Expression Differences of Metabolic-Related Genes between CR and non-CR Groups

A Expression differences of glycolysis and gluconeogenesis-related genes in CR vs non-CR groups (Statistical significance was determined by t‑test. *p < 0.05).

B Expression differences of TCA cycle-related genes in CR vs non-CR groups. *p < 0.05).

C Expression differences of pyrimidine metabolism-related genes in CR vs non-CR groups. **p < 0.01, *p < 0.05).

D Expression differences of phenylalanine metabolism-related genes in CR vs non-CR groups. **p < 0.01, *p < 0.05).


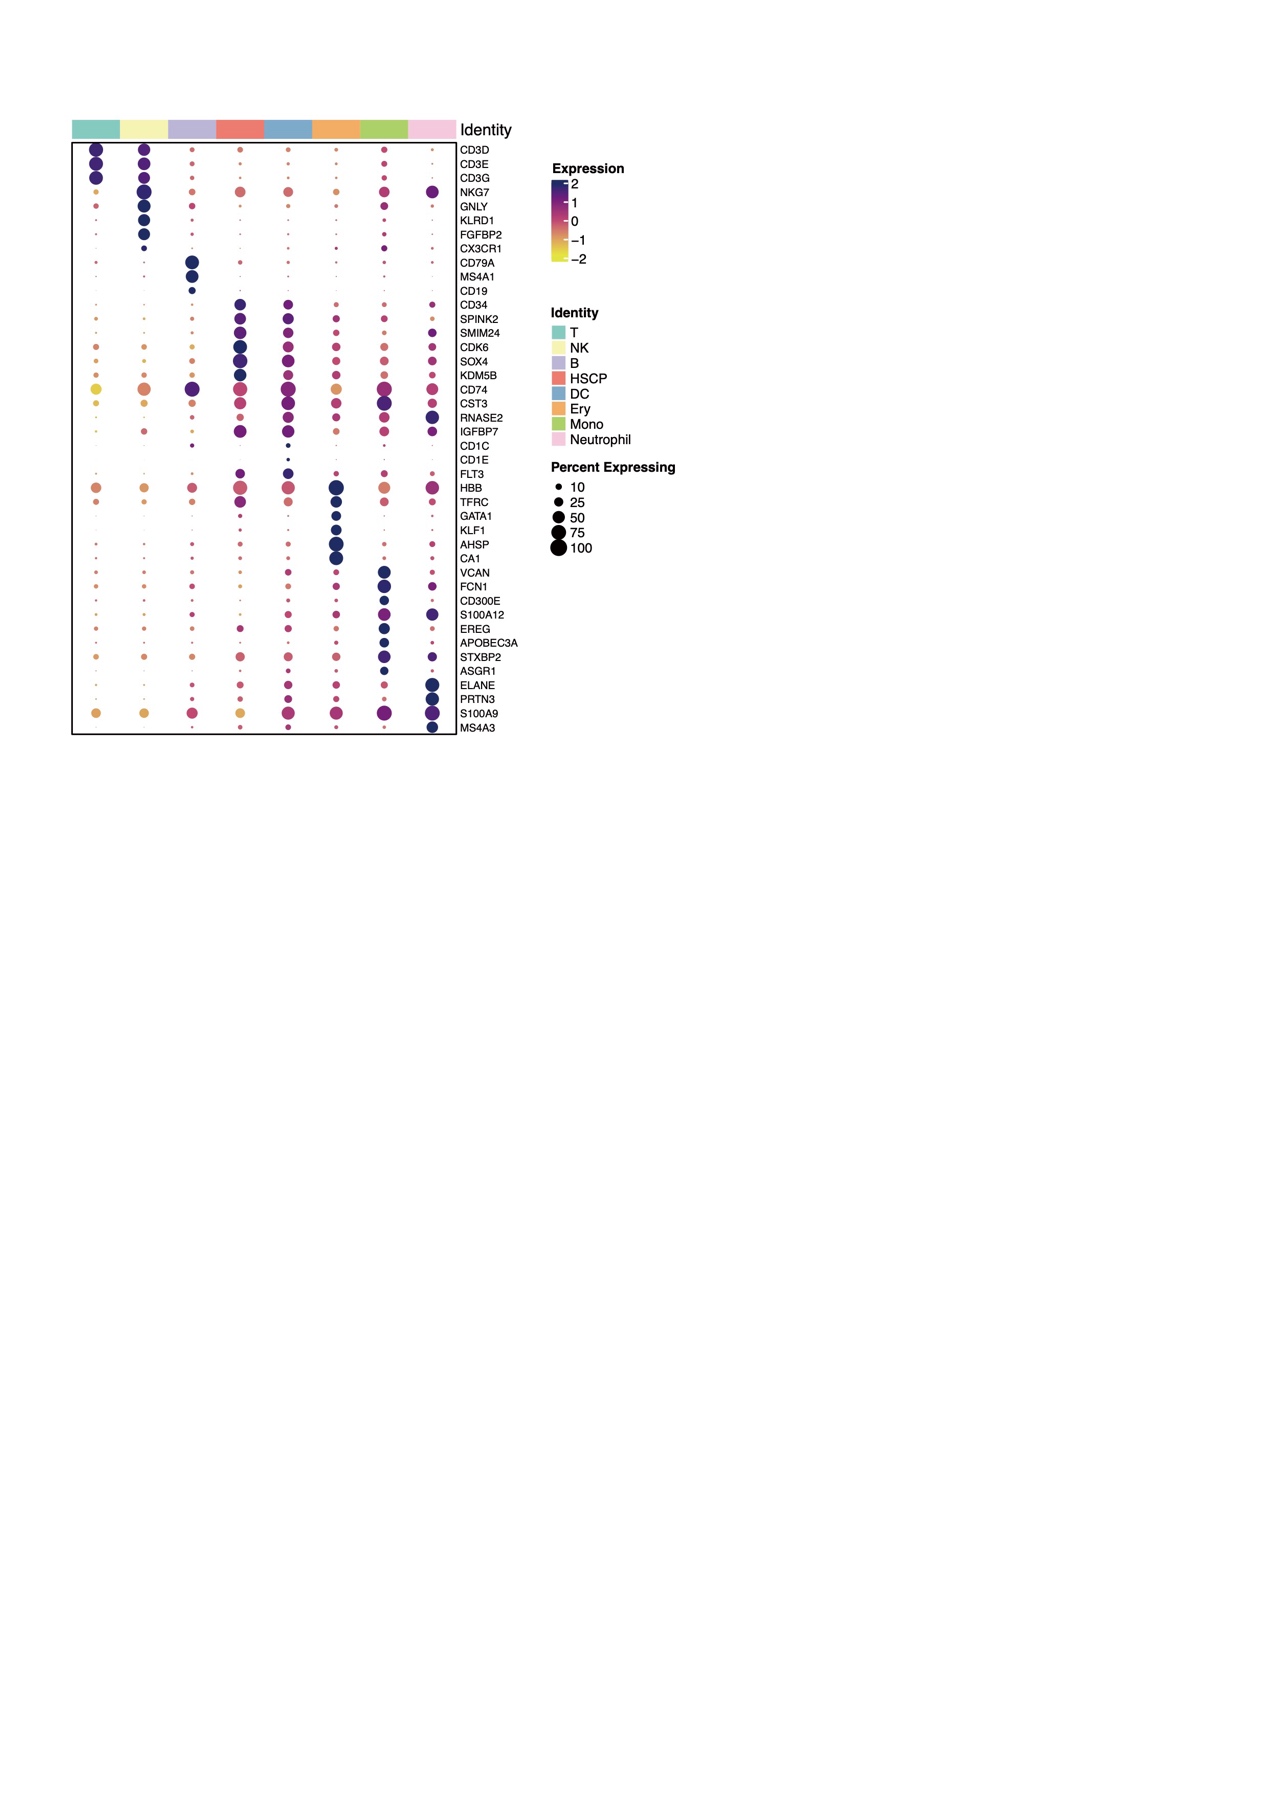


**Supplementary Figure 2: Specific Gene Expression in Different Cell Types**

**Supplementary Table**

Due to the large file sizes of some supplementary tables, not all can be provided separately. Here, we include only a portion of the data (Tables S2, S3, S6, S7, S8, S9, S11, and S12). The full versions can be downloaded via the web link provided. See 10.6084/m9.figshare.32400792;

<URL:https://figshare.com/articles/dataset/_b_Supplementary_b_b_Tables_1_12_of_the_article_Metabolic_Subtypes_Predict_Treatment_Response_in_Acute_Myeloid_Leukemia_A_Pilot_Study_b_/32400792>

| **Supplementary Table 1. Clinical Characteristics of 29 AML Patients** | | |
| --- | --- | --- |
|  | **level** | **Overall** |
| **n** |  | 29 |
| **FAB** | M0 | 1 (3.45) |
|  | M1 | 3 (10.34) |
|  | M2 | 12 (41.38) |
|  | M4 | 1 (3.45) |
|  | M5 | 12 (41.38) |
| **Age (median [IQR])** |  | 43.000 [27.000, 62.000] |
| **Sex (%)** | Female | 16 (55.17) |
|  | Male | 13 (44.83) |
| **Height (mean (SD))** |  | 162.379 (7.547) |
| **Weight (mean (SD))** |  | 60.114 (11.089) |
| **BMI (mean (SD))** |  | 22.788 (3.717) |
| **BM blast at Diagnose% (mean (SD))** |  | 0.642 (0.254) |
| **ELN2022 (%)** | Favorable | 2 (6.90) |
|  | Intermediate | 15 (51.72) |
|  | Adverse | 12 (41.38) |
| **OS（month） (mean (SD))** |  | 13.517 (8.292) |
| **Alcohol(%)** | no | 25 (86.21) |
|  | yes | 4 (13.79) |
| **Hypertension (%)** | no | 24 (82.76) |
|  | yes | 5 (17.24) |
| **Diabetes mellitus (%)** | no | 24 (82.76) |
|  | yes | 5 (17.24) |
| **Multiple primary malignancies (%)** | no | 25 (86.21) |
|  | yes | 4 (13.79) |
| **Bone marrow blasts(mean (SD))** |  | 8.287 (24.630) |
| **WBC(mean (SD))** |  | 52.714 (54.648) |
| **Hemoglobin (mean (SD))** |  | 69.862 (22.644) |
| **Platelet (mean (SD))** |  | 73.586 (127.588) |
| **LDH（IU/L） (mean (SD))** |  | 625.414 (417.125) |

| **Supplementary Table 2. Compound detected Information Table** | | | | | | | | | |
| --- | --- | --- | --- | --- | --- | --- | --- | --- | --- |
| **Compounds id** | **cpd_ID** | **Q1 (Da)** | **Molecular weight (Da)** | **Ionization model** | **Formula** | **Level** | **Compounds** | **Class I** | **Class II** |
| FDATN00018 | - | 527.2832 | 264.147393 | [2M-H]- | C14H20N2O3 | 2 | Vorinostat | Benzene and substituted derivatives | Benzene and substituted derivatives |
| FDATN00053 | - | 286.1038 | 365.053663 | [M,H], | C10H13FN5O7P | 1 | Fludarabine phosphate | Others | Medicine |
| FDATN00282 | - | 631.1955 | 612.205421 | [M,F]- | C28H36O15 | 2 | Neohesperidin dihydrochalcone | Aldehyde,Ketones,Esters | Ketones |
| FDATN00501 | - | 465.1963 | 465.191816 | [M-]- | C24H32ClNO6 | 1 | Sarpogrelate hydrochloride | Others | Medicine |
| FDATN00507 | - | 438.11865 | 437.112187 | [M,H], | C22H17F2N5OS | 1 | Isavuconazole | Others | Medicine |
| FDATN01012 | - | 489.2831 | 430.269517 | [M,CH3COO]- | C24H39NaO5 | 1 | Sodium cholate | Others | Medicine |
| FDATN01027 | - | 299.1832 | 298.179361 | [M,H], | C17H22N4O | 2 | Minaprine | Heterocyclic compounds | Heterocyclic compounds |
| FDATN01264 | - | 152.0359 | 211.045665 | [M-]- | C7H10NNaO5 | 1 | Sodium 4-aminosalicylate dihydrate | Others | Medicine |
| FDATN01266 | - | 167.0352 | 168.042259 | [M-H]- | C8H8O4 | 1 | Dehydroacetic acid | Others | Medicine |
| FDATN01439 | - | 251.1394 | 216.039852 | [M,Cl]- | C10H9NaO4 | 1 | Sodium ferulate | Others | Medicine |
| FDATN01523 | - | 375.1293 | 330.124739 | [M,HCOO]- | C17H19ClN4O | 1 | Alosetron hydrochloride | Others | Medicine |
| FDATN01529 | - | 232.0282 | 197.054889 | [M,Cl]- | C6H7N5O3 | 1 | Xanthopterin monohydrate | Others | Medicine |
| FDATP01291 | - | 302.1952 | 417.201219 | [M,H], | C20H27N5O5 | 2 | Tegaserod maleate | Others | Medicine |
| FDATP01419 | - | 236.99195 | 217.998025 | [M,F]- | C7H7O6P | 2 | Fosfosal | Organic acid and Its derivatives | Phosphoric acids |
| MEDL00375 | - | 314.1126 | 333.132471 | [M-H2O-H]- | C16H19N3O5 | 2 | Oglufanide | Amino acid and Its metabolites | Small Peptide |
| MEDL00401 | - | 233.1551 | 234.16198 | [M-H]- | C15H22O2 | 1 | Confertifoline | Aldehyde,Ketones,Esters | Esters |
| MEDL00655 | - | 397.2055 | 398.211804 | [M-H]- | C22H27FN4O2 | 2 | Sunitinib | Others | Medicine |
| MEDL01837 | - | 293.17685 | 294.183109 | [M-H]- | C17H26O4 | 1 | Nordihydrocapsiate | Phenolic acids | Phenolic acids |
| MEDL01878 | - | 222.0765 | 221.068808 | [M,H], | C11H11NO4 | 1 | Methyl dioxindole-3-acetate | Heterocyclic compounds | Indole and Its derivatives |
| MEDL01927 | - | 259.028 | 238.047738 | [M,Na-2H]- | C11H10O6 | 1 | Benzoylmalic acid | Phenolic acids | Phenolic acids |
| MEDL01937 | - | 159.0565 | 90.0680796 | [M,Na,HCOOH], | C4H10O2 | 1 | 2,3-Butanediol | Others | Saccharides and Alcohols |
| MEDL02155 | C21649 | 135.03005 | 136.037173 | [M-H]- | C4H8O5 | 1 | Threonic acid | Organic acid and Its derivatives | Organic acid and Its derivatives |
| MEDL02284 | C02183 | 125.0244 | 126.031694 | [M-H]- | C6H6O3 | 3 | 1,3,5-Trihydroxybenzene | Benzene and substituted derivatives | Phenolics |
| MEDL02558 | - | 470.0876 | 340.058303 | [M,Cl,NH3]- | C18H12O7 | 1 | Salvianolic acid G | Phenolic acids | Phenolic acids |
| MEDL02636 | C01575 | 148.1117 | 165.115364 | [M,H-H2O], | C10H15NO | 1 | Ephedrine | Benzene and substituted derivatives | Benzene and substituted derivatives |
| MEDN0006 | C00082 | 180.1 | 181.074 | [M-H]- | C9H11NO3 | 1 | L-Tyrosine | Amino acid and Its metabolites | Amino acids |
| MEDN0010 | C00327 | 174.1 | 175.096 | [M-H]- | C6H13N3O3 | 1 | L-Citrulline | Amino acid and Its metabolites | Amino acids |
| MEDN0018 | C00065 | 104 | 105.043 | [M-H]- | C3H7NO3 | 1 | L-Serine | Amino acid and Its metabolites | Amino acids |
| MEDN0025 | C03761 | 161 | 162.053 | [M-H]- | C6H10O5 | 1 | 3-Hydroxy-3-Methylpentane-1,5-Dioic Acid | Amino acid and Its metabolites | Amino acid derivatives |
| MEDN0029 | C01179 | 179 | 180.042 | [M-H]- | C9H8O4 | 1 | 4-Hydroxyphenylpyruvic Acid | Amino acid and Its metabolites | Amino acid derivatives |
| MEDN0032 | C01551 | 157 | 158.044 | [M-H]- | C4H6N4O3 | 2 | Allantoin | Organic acid and Its derivatives | Organic acid and Its derivatives |
| MEDN0036 | C00993 | 159.1 | 160.085 | [M-H]- | C6H12N2O3 | 2 | Ala-Ala | Amino acid and Its metabolites | Small Peptide |
| MEDN0041 | - | 172.1 | 173.105 | [M-H]- | C8H15NO3 | 1 | Hexanoyl Glycine | Amino acid and Its metabolites | Amino acid derivatives |
| MEDN0042 | C00152 | 131 | 132.054 | [M-H]- | C4H8N2O3 | 2 | L-Asparagine Anhydrous | Amino acid and Its metabolites | Amino acids |
| MEDN0043 | C00386 | 225.1 | 226.107 | [M-H]- | C9H14N4O3 | 1 | L-Carnosine | Amino acid and Its metabolites | Amino acid derivatives |
| MEDN0056 | C02710 | 172.1 | 173.105 | [M-H]- | C8H15NO3 | 1 | N-Acetyl-L-Leucine | Amino acid and Its metabolites | Amino acid derivatives |
| MEDN0057 | C01657 | 222.1 | 223.085 | [M-H]- | C11H13NO4 | 1 | N-Acetyl-L-Tyrosine | Amino acid and Its metabolites | Amino acid derivatives |
| MEDN0060 | - | 158.1 | 159.09 | [M-H]- | C7H13NO3 | 1 | N-Isovaleroylglycine | Amino acid and Its metabolites | Amino acid derivatives |
| MEDN0062 | - | 130.1 | 131.058 | [M-H]- | C5H9NO3 | 1 | N-Propionylglycine | Amino acid and Its metabolites | Amino acids |
| MEDN0065 | C01005 | 184 | 185.009 | [M-H]- | C3H8NO6P | 2 | O-Phospho-L-Serine | Amino acid and Its metabolites | Amino acid derivatives |
| MEDN0066 | C04148 | 263.1 | 264.111 | [M-H]- | C13H16N2O4 | 1 | Phenylacetyl-L-Glutamine | Amino acid and Its metabolites | Amino acid derivatives |
| MEDN0072 | C01157 | 130.1 | 131.058 | [M-H]- | C5H9NO3 | 1 | Trans-4-Hydroxy-L-Proline | Amino acid and Its metabolites | Amino acid derivatives |
| MEDN0085 | C02137 | 149 | 150.032 | [M-H]- | C8H6O3 | 1 | Benzoylformic Acid | Benzene and substituted derivatives | Phenolic acids |
| MEDN0086 | C06337 | 165 | 166.027 | [M-H]- | C8H6O4 | 1 | Terephthalic Acid | Benzene and substituted derivatives | Phenolic acids |

| **Supplementary Table 3. KEGG metabolic pathways (Compound version)** | | | | | |  |  |
| --- | --- | --- | --- | --- | --- | --- | --- |
| KEGG.ID | Compound.name | pathway_id | pathway_name | level1_pathway_name | level2_pathway_name | ENTREZID | Compound_name |
| C00022 | Pyruvate | hsa00010 | Glycolysis / Gluconeogenesis | Metabolism | Carbohydrate metabolism | C00022 | C00022 |
| C00024 | Acetyl-CoA | hsa00010 | Glycolysis / Gluconeogenesis | Metabolism | Carbohydrate metabolism | C00024 | C00024 |
| C00031 | D-Glucose | hsa00010 | Glycolysis / Gluconeogenesis | Metabolism | Carbohydrate metabolism | C00031 | C00031 |
| C00033 | Acetate | hsa00010 | Glycolysis / Gluconeogenesis | Metabolism | Carbohydrate metabolism | C00033 | C00033 |
| C00036 | Oxaloacetate | hsa00010 | Glycolysis / Gluconeogenesis | Metabolism | Carbohydrate metabolism | C00036 | C00036 |
| C00068 | Thiamin diphosphate | hsa00010 | Glycolysis / Gluconeogenesis | Metabolism | Carbohydrate metabolism | C00068 | C00068 |
| C00074 | Phosphoenolpyruvate | hsa00010 | Glycolysis / Gluconeogenesis | Metabolism | Carbohydrate metabolism | C00074 | C00074 |
| C00084 | Acetaldehyde | hsa00010 | Glycolysis / Gluconeogenesis | Metabolism | Carbohydrate metabolism | C00084 | C00084 |
| C00085 | D-Fructose 6-phosphate | hsa00010 | Glycolysis / Gluconeogenesis | Metabolism | Carbohydrate metabolism | C00085 | C00085 |
| C00103 | D-Glucose 1-phosphate | hsa00010 | Glycolysis / Gluconeogenesis | Metabolism | Carbohydrate metabolism | C00103 | C00103 |
| C00111 | Glycerone phosphate | hsa00010 | Glycolysis / Gluconeogenesis | Metabolism | Carbohydrate metabolism | C00111 | C00111 |
| C00118 | D-Glyceraldehyde 3-phosphate | hsa00010 | Glycolysis / Gluconeogenesis | Metabolism | Carbohydrate metabolism | C00118 | C00118 |
| C00186 | (S)-Lactate | hsa00010 | Glycolysis / Gluconeogenesis | Metabolism | Carbohydrate metabolism | C00186 | C00186 |
| C00197 | 3-Phospho-D-glycerate | hsa00010 | Glycolysis / Gluconeogenesis | Metabolism | Carbohydrate metabolism | C00197 | C00197 |
| C00221 | beta-D-Glucose | hsa00010 | Glycolysis / Gluconeogenesis | Metabolism | Carbohydrate metabolism | C00221 | C00221 |
| C00236 | 3-Phospho-D-glyceroyl phosphate | hsa00010 | Glycolysis / Gluconeogenesis | Metabolism | Carbohydrate metabolism | C00236 | C00236 |
| C00267 | alpha-D-Glucose | hsa00010 | Glycolysis / Gluconeogenesis | Metabolism | Carbohydrate metabolism | C00267 | C00267 |
| C00354 | D-Fructose 1,6-bisphosphate | hsa00010 | Glycolysis / Gluconeogenesis | Metabolism | Carbohydrate metabolism | C00354 | C00354 |
| C00469 | Ethanol | hsa00010 | Glycolysis / Gluconeogenesis | Metabolism | Carbohydrate metabolism | C00469 | C00469 |
| C00631 | 2-Phospho-D-glycerate | hsa00010 | Glycolysis / Gluconeogenesis | Metabolism | Carbohydrate metabolism | C00631 | C00631 |
| C00668 | alpha-D-Glucose 6-phosphate | hsa00010 | Glycolysis / Gluconeogenesis | Metabolism | Carbohydrate metabolism | C00668 | C00668 |
| C01159 | 2,3-Bisphospho-D-glycerate | hsa00010 | Glycolysis / Gluconeogenesis | Metabolism | Carbohydrate metabolism | C01159 | C01159 |
| C01172 | beta-D-Glucose 6-phosphate | hsa00010 | Glycolysis / Gluconeogenesis | Metabolism | Carbohydrate metabolism | C01172 | C01172 |
| C01451 | Salicin | hsa00010 | Glycolysis / Gluconeogenesis | Metabolism | Carbohydrate metabolism | C01451 | C01451 |
| C05125 | 2-(alpha-Hydroxyethyl)thiamine diphosphate | hsa00010 | Glycolysis / Gluconeogenesis | Metabolism | Carbohydrate metabolism | C05125 | C05125 |
| C06186 | Arbutin | hsa00010 | Glycolysis / Gluconeogenesis | Metabolism | Carbohydrate metabolism | C06186 | C06186 |
| C06187 | Arbutin 6-phosphate | hsa00010 | Glycolysis / Gluconeogenesis | Metabolism | Carbohydrate metabolism | C06187 | C06187 |
| C06188 | Salicin 6-phosphate | hsa00010 | Glycolysis / Gluconeogenesis | Metabolism | Carbohydrate metabolism | C06188 | C06188 |
| C15972 | Enzyme N6-(lipoyl)lysine | hsa00010 | Glycolysis / Gluconeogenesis | Metabolism | Carbohydrate metabolism | C15972 | C15972 |
| C15973 | Enzyme N6-(dihydrolipoyl)lysine | hsa00010 | Glycolysis / Gluconeogenesis | Metabolism | Carbohydrate metabolism | C15973 | C15973 |
| C16255 | [Dihydrolipoyllysine-residue acetyltransferase] S-acetyldihydrolipoyllysine | hsa00010 | Glycolysis / Gluconeogenesis | Metabolism | Carbohydrate metabolism | C16255 | C16255 |
| C00022 | Pyruvate | hsa00020 | Citrate cycle (TCA cycle) | Metabolism | Carbohydrate metabolism | C00022 | C00022 |
| C00024 | Acetyl-CoA | hsa00020 | Citrate cycle (TCA cycle) | Metabolism | Carbohydrate metabolism | C00024 | C00024 |
| C00026 | 2-Oxoglutarate | hsa00020 | Citrate cycle (TCA cycle) | Metabolism | Carbohydrate metabolism | C00026 | C00026 |
| C00036 | Oxaloacetate | hsa00020 | Citrate cycle (TCA cycle) | Metabolism | Carbohydrate metabolism | C00036 | C00036 |
| C00042 | Succinate | hsa00020 | Citrate cycle (TCA cycle) | Metabolism | Carbohydrate metabolism | C00042 | C00042 |
| C00068 | Thiamin diphosphate | hsa00020 | Citrate cycle (TCA cycle) | Metabolism | Carbohydrate metabolism | C00068 | C00068 |
| C00074 | Phosphoenolpyruvate | hsa00020 | Citrate cycle (TCA cycle) | Metabolism | Carbohydrate metabolism | C00074 | C00074 |
| C00091 | Succinyl-CoA | hsa00020 | Citrate cycle (TCA cycle) | Metabolism | Carbohydrate metabolism | C00091 | C00091 |
| C00122 | Fumarate | hsa00020 | Citrate cycle (TCA cycle) | Metabolism | Carbohydrate metabolism | C00122 | C00122 |
| C00149 | (S)-Malate | hsa00020 | Citrate cycle (TCA cycle) | Metabolism | Carbohydrate metabolism | C00149 | C00149 |
| C00158 | Citrate | hsa00020 | Citrate cycle (TCA cycle) | Metabolism | Carbohydrate metabolism | C00158 | C00158 |
| C00311 | Isocitrate | hsa00020 | Citrate cycle (TCA cycle) | Metabolism | Carbohydrate metabolism | C00311 | C00311 |
| C00417 | cis-Aconitate | hsa00020 | Citrate cycle (TCA cycle) | Metabolism | Carbohydrate metabolism | C00417 | C00417 |
| C05125 | 2-(alpha-Hydroxyethyl)thiamine diphosphate | hsa00020 | Citrate cycle (TCA cycle) | Metabolism | Carbohydrate metabolism | C05125 | C05125 |
| C05379 | Oxalosuccinate | hsa00020 | Citrate cycle (TCA cycle) | Metabolism | Carbohydrate metabolism | C05379 | C05379 |
| C05381 | 3-Carboxy-1-hydroxypropyl-ThPP | hsa00020 | Citrate cycle (TCA cycle) | Metabolism | Carbohydrate metabolism | C05381 | C05381 |
| C15972 | Enzyme N6-(lipoyl)lysine | hsa00020 | Citrate cycle (TCA cycle) | Metabolism | Carbohydrate metabolism | C15972 | C15972 |
| C15973 | Enzyme N6-(dihydrolipoyl)lysine | hsa00020 | Citrate cycle (TCA cycle) | Metabolism | Carbohydrate metabolism | C15973 | C15973 |
| C16254 | [Dihydrolipoyllysine-residue succinyltransferase] S-succinyldihydrolipoyllysine | hsa00020 | Citrate cycle (TCA cycle) | Metabolism | Carbohydrate metabolism | C16254 | C16254 |
| C16255 | [Dihydrolipoyllysine-residue acetyltransferase] S-acetyldihydrolipoyllysine | hsa00020 | Citrate cycle (TCA cycle) | Metabolism | Carbohydrate metabolism | C16255 | C16255 |
| C00022 | Pyruvate | hsa00030 | Pentose phosphate pathway | Metabolism | Carbohydrate metabolism | C00022 | C00022 |
| C00031 | D-Glucose | hsa00030 | Pentose phosphate pathway | Metabolism | Carbohydrate metabolism | C00031 | C00031 |
| C00085 | D-Fructose 6-phosphate | hsa00030 | Pentose phosphate pathway | Metabolism | Carbohydrate metabolism | C00085 | C00085 |
| C00117 | D-Ribose 5-phosphate | hsa00030 | Pentose phosphate pathway | Metabolism | Carbohydrate metabolism | C00117 | C00117 |
| C00118 | D-Glyceraldehyde 3-phosphate | hsa00030 | Pentose phosphate pathway | Metabolism | Carbohydrate metabolism | C00118 | C00118 |
| C00119 | 5-Phospho-alpha-D-ribose 1-diphosphate | hsa00030 | Pentose phosphate pathway | Metabolism | Carbohydrate metabolism | C00119 | C00119 |
| C00121 | D-Ribose | hsa00030 | Pentose phosphate pathway | Metabolism | Carbohydrate metabolism | C00121 | C00121 |
| C00197 | 3-Phospho-D-glycerate | hsa00030 | Pentose phosphate pathway | Metabolism | Carbohydrate metabolism | C00197 | C00197 |
| C00198 | D-Glucono-1,5-lactone | hsa00030 | Pentose phosphate pathway | Metabolism | Carbohydrate metabolism | C00198 | C00198 |
| C00199 | D-Ribulose 5-phosphate | hsa00030 | Pentose phosphate pathway | Metabolism | Carbohydrate metabolism | C00199 | C00199 |
| C00204 | 2-Dehydro-3-deoxy-D-gluconate | hsa00030 | Pentose phosphate pathway | Metabolism | Carbohydrate metabolism | C00204 | C00204 |
| C00221 | beta-D-Glucose | hsa00030 | Pentose phosphate pathway | Metabolism | Carbohydrate metabolism | C00221 | C00221 |
| C00231 | D-Xylulose 5-phosphate | hsa00030 | Pentose phosphate pathway | Metabolism | Carbohydrate metabolism | C00231 | C00231 |
| C00257 | D-Gluconic acid | hsa00030 | Pentose phosphate pathway | Metabolism | Carbohydrate metabolism | C00257 | C00257 |
| C00258 | D-Glycerate | hsa00030 | Pentose phosphate pathway | Metabolism | Carbohydrate metabolism | C00258 | C00258 |
| C00279 | D-Erythrose 4-phosphate | hsa00030 | Pentose phosphate pathway | Metabolism | Carbohydrate metabolism | C00279 | C00279 |
| C00345 | 6-Phospho-D-gluconate | hsa00030 | Pentose phosphate pathway | Metabolism | Carbohydrate metabolism | C00345 | C00345 |
| C00354 | D-Fructose 1,6-bisphosphate | hsa00030 | Pentose phosphate pathway | Metabolism | Carbohydrate metabolism | C00354 | C00354 |
| C00577 | D-Glyceraldehyde | hsa00030 | Pentose phosphate pathway | Metabolism | Carbohydrate metabolism | C00577 | C00577 |
| C00620 | alpha-D-Ribose 1-phosphate | hsa00030 | Pentose phosphate pathway | Metabolism | Carbohydrate metabolism | C00620 | C00620 |
| C00631 | 2-Phospho-D-glycerate | hsa00030 | Pentose phosphate pathway | Metabolism | Carbohydrate metabolism | C00631 | C00631 |
| C00668 | alpha-D-Glucose 6-phosphate | hsa00030 | Pentose phosphate pathway | Metabolism | Carbohydrate metabolism | C00668 | C00668 |
| C00672 | 2-Deoxy-D-ribose 1-phosphate | hsa00030 | Pentose phosphate pathway | Metabolism | Carbohydrate metabolism | C00672 | C00672 |
| C00673 | 2-Deoxy-D-ribose 5-phosphate | hsa00030 | Pentose phosphate pathway | Metabolism | Carbohydrate metabolism | C00673 | C00673 |
| C01151 | D-Ribose 1,5-bisphosphate | hsa00030 | Pentose phosphate pathway | Metabolism | Carbohydrate metabolism | C01151 | C01151 |
| C01172 | beta-D-Glucose 6-phosphate | hsa00030 | Pentose phosphate pathway | Metabolism | Carbohydrate metabolism | C01172 | C01172 |
| C01182 | D-Ribulose 1,5-bisphosphate | hsa00030 | Pentose phosphate pathway | Metabolism | Carbohydrate metabolism | C01182 | C01182 |
| C01218 | 6-Phospho-2-dehydro-D-gluconate | hsa00030 | Pentose phosphate pathway | Metabolism | Carbohydrate metabolism | C01218 | C01218 |

**Supplementary Table 4. GSVA result of blood metabolites at baseline**

| Gene | p_value | Mean_Control | Mean_Test | log2FC |
| --- | --- | --- | --- | --- |
| Citrate cycle (TCA cycle) | 2.35E-06 | 0.47490783 | -0.394146821 | -0.869054651 |
| Pyruvate metabolism | 2.35E-06 | 0.47490783 | -0.394146821 | -0.869054651 |
| Glycolysis / Gluconeogenesis | 5.21E-05 | 0.280622946 | -0.326223931 | -0.606846878 |
| Propanoate metabolism | 0.000385192 | 0.30575878 | -0.255222094 | -0.560980874 |
| Butanoate metabolism | 0.001050082 | 0.264982658 | -0.337965789 | -0.602948447 |
| Oxidative phosphorylation | 0.006052919 | 0.212650751 | -0.360529986 | -0.573180737 |
| Fatty acid biosynthesis | 0.006672896 | -0.29838219 | 0.155625499 | 0.454007689 |
| Glyoxylate and dicarboxylate metabolism | 0.015409633 | 0.069872778 | -0.217388042 | -0.28726082 |
| Folate biosynthesis | 0.051382331 | 0.202067438 | 0.538702929 | 0.336635491 |
| Pyrimidine metabolism | 0.025571866 | 0.033687979 | -0.097890983 | -0.131578962 |
| Steroid hormone biosynthesis | 0.057795717 | 0.157923611 | -0.075283484 | -0.233207095 |
| Alanine, aspartate and glutamate metabolism | 0.069388851 | -0.14184867 | -0.361802417 | -0.219953747 |
| Ascorbate and aldarate metabolism | 0.07055175 | 0.156169377 | -0.152652493 | -0.30882187 |
| Pantothenate and CoA biosynthesis | 0.078258084 | -0.001024355 | -0.188177241 | -0.187152886 |
| Biosynthesis of unsaturated fatty acids | 0.108000112 | -0.365339129 | -0.060886139 | 0.304452991 |
| Phenylalanine, tyrosine and tryptophan biosynthesis | 0.124122437 | 0.078240021 | -0.127870089 | -0.206110109 |
| Ether lipid metabolism | 0.136472722 | 0.192960866 | -0.205718271 | -0.398679137 |
| Glycerophospholipid metabolism | 0.141755389 | 0.03875589 | -0.209726052 | -0.248481942 |
| Thiamine metabolism | 0.143388452 | 0.063835543 | -0.17767199 | -0.241507533 |
| Phenylalanine metabolism | 0.146991104 | -0.121665928 | -0.27492366 | -0.153257732 |
| Primary bile acid biosynthesis | 0.17436394 | -0.112326928 | 0.097746635 | 0.210073563 |
| Arginine and proline metabolism | 0.187097539 | -0.065577956 | 0.091926434 | 0.15750439 |
| Purine metabolism | 0.197469458 | 0.056451914 | 0.179217965 | 0.122766051 |
| Vitamin B6 metabolism | 0.20340609 | 0.168332105 | -0.107672858 | -0.276004963 |
| Tyrosine metabolism | 0.217812378 | -0.034549829 | -0.127846474 | -0.093296645 |
| Arachidonic acid metabolism | 0.235420062 | 0.111247846 | 0.34553696 | 0.234289113 |
| Linoleic acid metabolism | 0.254197023 | -0.218881436 | -0.044856313 | 0.174025123 |
| Biotin metabolism | 0.3330576 | 0.24344141 | 0.069291788 | -0.174149621 |
| Riboflavin metabolism | 0.427743948 | -0.03741078 | 0.146443515 | 0.183854295 |
| Cysteine and methionine metabolism | 0.430744344 | -0.023863118 | 0.063210441 | 0.087073559 |
| Starch and sucrose metabolism | 0.464225021 | 0.031666803 | -0.106706003 | -0.138372806 |
| Ubiquinone and other terpenoid-quinone biosynthesis | 0.475264105 | -0.01071164 | -0.091164028 | -0.080452388 |
| Valine, leucine and isoleucine biosynthesis | 0.497274755 | -0.023242008 | -0.125769798 | -0.10252779 |
| Pentose and glucuronate interconversions | 0.518481222 | -0.095736808 | 0.057331022 | 0.153067831 |
| Valine, leucine and isoleucine degradation | 0.558894504 | -0.16645461 | -0.254363109 | -0.087908499 |
| alpha-Linolenic acid metabolism | 0.560467793 | 0.000110968 | 0.103445287 | 0.103334319 |
| Fatty acid degradation | 0.563506374 | 0.172040364 | 0.268479777 | 0.096439413 |
| Lipoic acid metabolism | 0.566909087 | 0.00638308 | 0.116182246 | 0.109799166 |
| Steroid biosynthesis | 0.56778158 | -0.138401805 | -0.009643719 | 0.128758086 |
| Lysine degradation | 0.572504075 | 0.102529825 | 0.036423598 | -0.066106227 |
| Galactose metabolism | 0.581550902 | -0.103305183 | -0.192772157 | -0.089466974 |
| Nicotinate and nicotinamide metabolism | 0.656187579 | 0.037613777 | 0.088737815 | 0.051124038 |
| Sphingolipid metabolism | 0.699720913 | -0.204557329 | -0.284987684 | -0.080430355 |
| Fructose and mannose metabolism | 0.704125909 | -0.096568716 | -0.174105876 | -0.07753716 |
| Tryptophan metabolism | 0.729230193 | -0.164950677 | -0.12872464 | 0.036226036 |
| Porphyrin metabolism | 0.758767788 | 0.219396655 | 0.173681433 | -0.045715222 |
| Amino sugar and nucleotide sugar metabolism | 0.781709216 | -0.145730686 | -0.197703707 | -0.051973021 |
| Inositol phosphate metabolism | 0.820611508 | 0.012306178 | 0.067991632 | 0.055685454 |
| Arginine biosynthesis | 0.856998288 | 0.043110937 | 0.072519139 | 0.029408202 |
| Pentose phosphate pathway | 0.878031479 | -0.211969447 | -0.188206003 | 0.023763444 |
| Sulfur metabolism | 0.903003729 | -0.035922808 | -0.051005819 | -0.015083012 |
| Glycine, serine and threonine metabolism | 0.974245737 | 0.009967375 | 0.006190119 | -0.003777255 |
| Nitrogen metabolism | 0.975781839 | -0.040118139 | -0.04637378 | -0.00625564 |
| Histidine metabolism | 0.983228006 | -0.003031383 | -0.005546298 | -0.002514915 |
| Glycerolipid metabolism | 0.994576546 | -0.020482845 | -0.018847749 | 0.001635097 |

| **Supplementary Table 5. Posttreatment blood metabolite GSVA pathway enrichment in metabolic subtypes** | | | | |
| --- | --- | --- | --- | --- |
| Gene | p_value | Mean_Control | Mean_Test | log2FC |
| Pantothenate and CoA biosynthesis | 0.00065623 | 0.2712349 | -0.1580383 | -0.4292732 |
| Glycerophospholipid metabolism | 0.00073656 | -0.0545704 | 0.48474701 | 0.53931738 |
| Fatty acid biosynthesis | 0.00080832 | 0.299106 | -0.3854113 | -0.6845173 |
| Biotin metabolism | 0.0013735 | 0.27691907 | -0.3074423 | -0.5843614 |
| Glycerolipid metabolism | 0.00285772 | -0.0450752 | 0.69567069 | 0.74074588 |
| Cysteine and methionine metabolism | 0.00381898 | -0.0390927 | 0.30240583 | 0.34149854 |
| Butanoate metabolism | 0.01745286 | -0.0762844 | -0.5515864 | -0.475302 |
| Propanoate metabolism | 0.03156157 | -0.0904685 | -0.4317828 | -0.3413142 |
| Histidine metabolism | 0.04865027 | 0.06284729 | -0.2369051 | -0.2997524 |
| Primary bile acid biosynthesis | 0.05530147 | 0.07156009 | 0.36726628 | 0.29570618 |
| Riboflavin metabolism | 0.07681817 | 0.24937238 | -0.2552301 | -0.5046025 |
| Nitrogen metabolism | 0.10694132 | 0.09037657 | -0.3271206 | -0.4174971 |
| Fructose and mannose metabolism | 0.14854883 | -0.2500906 | 0.07467438 | 0.32476497 |
| Glycine, serine and threonine metabolism | 0.1540768 | 0.06433055 | 0.21449148 | 0.15016094 |
| alpha-Linolenic acid metabolism | 0.1698924 | 0.19898274 | -0.1483852 | -0.347368 |
| Ascorbate and aldarate metabolism | 0.17690643 | -0.0382255 | -0.2817447 | -0.2435192 |
| Glyoxylate and dicarboxylate metabolism | 0.19685222 | 0.08606995 | -0.1443665 | -0.2304364 |
| Purine metabolism | 0.20665731 | 0.22965882 | 0.37566716 | 0.14600834 |
| Phenylalanine, tyrosine and tryptophan biosynthesis | 0.23224578 | -0.3365282 | -0.5088377 | -0.1723096 |
| Sphingolipid metabolism | 0.23507108 | -0.0005451 | 0.28516788 | 0.28571302 |
| Phenylalanine metabolism | 0.25214792 | -0.1727017 | -0.2955266 | -0.1228249 |
| Pentose phosphate pathway | 0.26496243 | 0.06192836 | 0.2617624 | 0.19983404 |
| Oxidative phosphorylation | 0.28884484 | -0.0953975 | -0.3712438 | -0.2758463 |
| Tryptophan metabolism | 0.30855024 | -0.0549059 | 0.0821431 | 0.13704904 |
| Galactose metabolism | 0.32955527 | -0.1936827 | 0.0125055 | 0.20618818 |
| Fatty acid degradation | 0.34516862 | 0.55857741 | 0.33967288 | -0.2189045 |
| Pyrimidine metabolism | 0.36095296 | 0.11070099 | 0.00931784 | -0.1013831 |
| Pentose and glucuronate interconversions | 0.43167474 | 0.01698567 | -0.2031505 | -0.2201361 |
| Valine, leucine and isoleucine degradation | 0.43973359 | -0.3514733 | -0.480134 | -0.1286607 |
| Citrate cycle (TCA cycle) | 0.5051265 | -0.1521379 | -0.3066645 | -0.1545266 |
| Pyruvate metabolism | 0.5051265 | -0.1521379 | -0.3066645 | -0.1545266 |
| Ether lipid metabolism | 0.50714795 | -0.174477 | 0.00988969 | 0.18436668 |
| Starch and sucrose metabolism | 0.59285504 | -0.0285274 | -0.1433693 | -0.1148419 |
| Steroid biosynthesis | 0.59628614 | 0.07288843 | 0.21172194 | 0.13883351 |
| Nicotinate and nicotinamide metabolism | 0.62529731 | -0.0002977 | -0.0482913 | -0.0479936 |
| Amino sugar and nucleotide sugar metabolism | 0.69426495 | 0.17539625 | 0.10371029 | -0.071686 |
| Inositol phosphate metabolism | 0.73713187 | 0.06401674 | 0.15100799 | 0.08699125 |
| Steroid hormone biosynthesis | 0.74079294 | 0.01398977 | -0.0276269 | -0.0416167 |
| Folate biosynthesis | 0.74850739 | -0.1937238 | -0.2502853 | -0.0565614 |
| Biosynthesis of unsaturated fatty acids | 0.7787498 | 0.13278706 | 0.0781319 | -0.0546552 |
| Arachidonic acid metabolism | 0.77959201 | 0.29246862 | 0.2472423 | -0.0452263 |
| Thiamine metabolism | 0.78891706 | -0.0770163 | -0.1274225 | -0.0504061 |
| Ubiquinone and other terpenoid-quinone biosynthesis | 0.82368812 | -0.2862335 | -0.254266 | 0.03196747 |
| Lysine degradation | 0.85447926 | 0.14653336 | 0.1774732 | 0.03093984 |
| Tyrosine metabolism | 0.87522365 | -0.1531212 | -0.1380474 | 0.0150738 |
| Arginine and proline metabolism | 0.87759737 | -0.0067677 | -0.0285749 | -0.0218072 |
| Linoleic acid metabolism | 0.89537645 | 0.2226799 | 0.24262533 | 0.01994543 |
| Valine, leucine and isoleucine biosynthesis | 0.89862256 | -0.395092 | -0.4131505 | -0.0180585 |
| Alanine, aspartate and glutamate metabolism | 0.90910939 | -0.0650466 | -0.0830782 | -0.0180317 |
| Vitamin B6 metabolism | 0.92084483 | -0.2078231 | -0.2324631 | -0.0246399 |
| Sulfur metabolism | 0.92701524 | 0.12545929 | 0.13799595 | 0.01253666 |
| Arginine biosynthesis | 0.93783333 | 0.07755723 | 0.06075623 | -0.016801 |
| Glycolysis / Gluconeogenesis | 0.95245956 | 0.02488178 | 0.03676371 | 0.01188194 |
| Lipoic acid metabolism | 0.96932684 | -0.0246686 | -0.016505 | 0.00816357 |
| Porphyrin metabolism | 0.97779955 | 0.25096627 | 0.2452866 | -0.0056797 |

| **Supplementary Table 6. Differential analysis of blood metabolites between G1 and G2 subtypes at baseline** | | | | |
| --- | --- | --- | --- | --- |
| Gene | p_value | Mean_Control | Mean_Test | log2FC |
| C00082 | 0.05390144 | 19.8214724 | 19.4419535 | -0.3795189 |
| C00327 | 0.78593167 | 18.6735288 | 18.608192 | -0.0653368 |
| C00065 | 0.66424454 | 16.1061968 | 16.0001948 | -0.106002 |
| C03761 | 0.34364389 | 14.2622018 | 13.7933049 | -0.4688969 |
| C01551 | 0.14812213 | 17.5526705 | 18.0132408 | 0.46057023 |
| C00152 | 0.90153973 | 16.5891288 | 16.6004198 | 0.01129103 |
| C02710 | 0.2544368 | 16.7027645 | 16.4592371 | -0.2435274 |
| C01657 | 0.00167709 | 15.7953826 | 15.2013228 | -0.5940598 |
| C01005 | 0.11920504 | 18.7929685 | 19.1095882 | 0.31661975 |
| C04148 | 0.2454166 | 21.212835 | 21.7899166 | 0.57708158 |
| C02137 | 0.35222215 | 15.9010469 | 16.0585285 | 0.15748155 |
| C06337 | 0.63998165 | 16.7474574 | 16.8374222 | 0.08996485 |
| C01606 | 0.24075676 | 15.8469222 | 15.4953297 | -0.3515925 |
| C00642 | 0.67569644 | 15.9800069 | 16.1921532 | 0.2121463 |
| C10164 | 0.47989163 | 20.5841588 | 20.4557915 | -0.1283674 |
| C05122 | 0.59815067 | 19.8389299 | 20.2215274 | 0.38259744 |
| C01697 | 0.56546835 | 13.8103401 | 14.1839149 | 0.3735748 |
| C00755 | 0.91388768 | 15.0895794 | 15.1181173 | 0.02853783 |
| C00385 | 0.56313085 | 20.7996391 | 20.6792304 | -0.1204087 |
| C02376 | 0.33218836 | 15.3415492 | 15.7113959 | 0.36984666 |
| C00106 | 0.69356139 | 16.3602146 | 16.4320826 | 0.07186799 |
| C01598 | 0.15068725 | 17.6413274 | 18.1541476 | 0.51282029 |
| C00398 | 0.62173271 | 18.5764309 | 18.6339668 | 0.05753597 |
| C00794 | 0.56546835 | 13.8103401 | 14.1839149 | 0.3735748 |
| C00031 | 0.44910464 | 16.7805426 | 16.5197906 | -0.260752 |
| C00159 | 0.44910464 | 16.7805426 | 16.5197906 | -0.260752 |
| C01083 | 0.46466348 | 20.4101857 | 20.2492148 | -0.1609709 |
| C00181 | 0.04126037 | 16.7662563 | 17.156408 | 0.39015166 |
| C00092 | 0.61412566 | 14.3966346 | 14.6102376 | 0.21360301 |
| C00243 | 0.46466348 | 20.4101857 | 20.2492148 | -0.1609709 |
| C07064 | 0.46466348 | 20.4101857 | 20.2492148 | -0.1609709 |
| C00208 | 0.46466348 | 20.4101857 | 20.2492148 | -0.1609709 |
| C00864 | 0.55171799 | 18.4379576 | 18.3195356 | -0.118422 |
| C13014 | 0.61308409 | 17.7692987 | 17.6766732 | -0.0926254 |
| C00245 | 0.07240931 | 21.6247265 | 22.4244843 | 0.79975781 |

| **Supplementary Table 7. Differential analysis of post-treatment blood metabolites between TG1 and TG2 subtypes** | | | | |
| --- | --- | --- | --- | --- |
| Gene | p_value | Mean_TG1 | Mean_TG2 | log2FC |
| C00082 | 0.22172707 | 19.55713069 | 19.2450825 | -0.3120481 |
| C00327 | 0.8422555 | 18.7586528 | 18.7084552 | -0.0501976 |
| C00065 | 0.43476551 | 16.32796847 | 16.5336321 | 0.20566366 |
| C03761 | 0.02172868 | 14.65035684 | 13.762599 | -0.8877578 |
| C01551 | 0.6228822 | 18.0316195 | 18.2072825 | 0.17566297 |
| C00152 | 0.25297258 | 16.67334469 | 16.851809 | 0.17846436 |
| C02710 | 0.0061869 | 16.36244898 | 15.7458116 | -0.6166374 |
| C01657 | 0.07589443 | 15.47172248 | 15.07379 | -0.3979325 |
| C01005 | 0.08561429 | 18.75795245 | 19.2706661 | 0.51271365 |
| C04148 | 0.93953733 | 22.41799604 | 22.4587368 | 0.04074072 |
| C02137 | 0.19292075 | 16.41307892 | 16.081082 | -0.331997 |
| C06337 | 0.57720386 | 16.89969749 | 16.8077893 | -0.0919082 |
| C01606 | 0.49598864 | 15.88998673 | 16.1656769 | 0.27569015 |
| C00642 | 0.56087056 | 16.90726584 | 17.2255004 | 0.31823454 |
| C10164 | 0.56880506 | 20.64797836 | 20.7105004 | 0.06252202 |
| C05122 | 0.11580682 | 19.07184287 | 18.0895668 | -0.9822761 |
| C01697 | 0.32194733 | 12.89446685 | 13.5871816 | 0.69271477 |
| C00755 | 0.30064391 | 15.27320702 | 15.4827478 | 0.20954078 |
| C00385 | 0.46109224 | 20.82281773 | 21.02359 | 0.20077226 |
| C02376 | 0.00777409 | 15.6764681 | 16.6064557 | 0.92998755 |
| C00106 | 0.17230046 | 16.57151133 | 16.2732059 | -0.2983054 |
| C01598 | 0.27264244 | 18.17705164 | 17.7997655 | -0.3772861 |
| C00398 | 0.2248337 | 18.62132584 | 18.7483981 | 0.12707229 |
| C00794 | 0.32194733 | 12.89446685 | 13.5871816 | 0.69271477 |
| C00031 | 0.98096543 | 17.07641949 | 17.0683528 | -0.0080667 |
| C00159 | 0.98096543 | 17.07641949 | 17.0683528 | -0.0080667 |
| C01083 | 0.33136424 | 20.29165712 | 19.9404082 | -0.3512489 |
| C00181 | 0.65575512 | 17.04590021 | 16.9701293 | -0.0757709 |
| C00092 | 0.97394777 | 14.43846741 | 14.4495822 | 0.01111474 |
| C00243 | 0.33136424 | 20.29165712 | 19.9404082 | -0.3512489 |
| C07064 | 0.33136424 | 20.29165712 | 19.9404082 | -0.3512489 |
| C00208 | 0.33136424 | 20.29165712 | 19.9404082 | -0.3512489 |
| C00864 | 0.06309772 | 19.11263163 | 18.5563738 | -0.5562579 |
| C13014 | 0.22667635 | 17.55197454 | 17.9062784 | 0.35430385 |
| C00245 | 0.3456112 | 22.61641582 | 23.098261 | 0.48184523 |

| **Supplementary Table 8. Differential gene expression between G1 and G2 subtypes at baseline** | | | | | | | |
| --- | --- | --- | --- | --- | --- | --- | --- |
| logFC | AveExpr | t | P.Value | adj.P.Val | B | gene | change |
| -1.9630625 | 2.28489393 | -4.9723963 | 3.06E-05 | 0.9758208 | 0.28436116 | DCAF13 | down |
| -1.6976579 | 1.74654759 | -4.8108415 | 4.75E-05 | 0.9758208 | 0.05620933 | ACAA2 | down |
| -1.699448 | 1.80272097 | -4.6715729 | 6.94E-05 | 0.9758208 | -0.1426047 | CHEK1 | down |
| 1.78451286 | 1.79775105 | 4.52537516 | 0.00010328 | 0.9758208 | -0.3531942 | LINC00520 | up |
| -1.5068909 | 2.61507124 | -4.5117792 | 0.00010716 | 0.9758208 | -0.3728672 | PKNOX2 | down |
| 1.2774528 | 0.74164411 | 4.50673333 | 0.00010864 | 0.9758208 | -0.3801721 | AL121933.2 | up |
| -1.6158203 | 1.47895241 | -4.4643416 | 0.00012188 | 0.9758208 | -0.4416175 | PSMD5 | down |
| -1.5238355 | 2.30710165 | -4.4334078 | 0.00013253 | 0.9758208 | -0.4865369 | SLC47A2 | down |
| -1.5582648 | 2.01247005 | -4.2659671 | 0.00020842 | 0.9758208 | -0.7307497 | R3HDM2 | down |
| -1.5955304 | 2.28566785 | -4.1981644 | 0.00025021 | 0.9758208 | -0.8300791 | ZSCAN25 | down |
| -1.2942409 | 0.88875096 | -4.1682217 | 0.00027121 | 0.9758208 | -0.8740108 | LINC00957 | down |
| -1.7361412 | 2.03234206 | -4.0915513 | 0.00033322 | 0.9758208 | -0.9866584 | C19orf47 | down |
| -1.3530707 | 1.90240501 | -4.0779987 | 0.00034556 | 0.9758208 | -1.0065911 | POLA2 | down |
| -1.4149824 | 0.92244171 | -4.0649504 | 0.00035785 | 0.9758208 | -1.0257873 | PIP5K1P1 | down |
| 1.57931346 | 1.0908844 | 4.01230605 | 0.000412 | 0.9758208 | -1.1032808 | AC025160.1 | up |
| -1.3423205 | 2.02827305 | -4.0104125 | 0.00041409 | 0.9758208 | -1.1060694 | LMBR1L | down |
| -1.5299407 | 2.79303938 | -3.9702817 | 0.00046094 | 0.9758208 | -1.1651845 | RAB3IP | down |
| 1.24633548 | 3.45741226 | 3.94571513 | 0.00049215 | 0.9758208 | -1.2013855 | FAM227A | up |
| -1.5613359 | 1.12971557 | -3.9301402 | 0.00051301 | 0.9758208 | -1.2243406 | SELENOK | down |
| -1.855652 | 2.0530357 | -3.9219094 | 0.00052438 | 0.9758208 | -1.2364726 | SYT3 | down |
| -0.8286016 | 4.12949358 | -3.9125138 | 0.00053766 | 0.9758208 | -1.2503223 | DNAH7 | stable |
| -1.4219753 | 1.65927374 | -3.904691 | 0.00054896 | 0.9758208 | -1.261854 | UBL3 | down |
| -1.0177172 | 3.19222791 | -3.9045171 | 0.00054922 | 0.9758208 | -1.2621104 | RRP12 | down |
| -1.4783882 | 1.56972334 | -3.8895838 | 0.00057147 | 0.9758208 | -1.2841251 | SOWAHC | down |
| 1.66537673 | 2.05546217 | 3.87532741 | 0.00059353 | 0.9758208 | -1.3051428 | CCDC198 | up |
| -1.420355 | 1.88655805 | -3.8750903 | 0.0005939 | 0.9758208 | -1.3054924 | PIGX | down |
| -1.4309811 | 1.55798942 | -3.8690125 | 0.00060357 | 0.9758208 | -1.3144529 | GOLIM4 | down |
| -1.4387242 | 1.62465872 | -3.863524 | 0.00061243 | 0.9758208 | -1.3225446 | LINC01992 | down |
| 1.17262788 | 3.20921601 | 3.85887186 | 0.00062004 | 0.9758208 | -1.3294034 | USP7 | up |
| -1.458308 | 1.64319061 | -3.8526891 | 0.00063029 | 0.9758208 | -1.3385188 | LINC01533 | down |
| -1.4473438 | 2.05090552 | -3.8422218 | 0.00064804 | 0.9758208 | -1.3539509 | DTD1 | down |
| 1.48538197 | 1.17014098 | 3.83270749 | 0.00066459 | 0.9758208 | -1.3679778 | PCDHGA4 | up |
| 1.10294791 | 0.54760403 | 3.82406597 | 0.00067998 | 0.9758208 | -1.3807178 | AC083855.2 | up |
| -1.1630975 | 3.31753458 | -3.8040399 | 0.00071701 | 0.9758208 | -1.4102402 | COL11A1 | down |
| -1.5104609 | 1.05309619 | -3.8034856 | 0.00071806 | 0.9758208 | -1.4110573 | SH3PXD2A-AS1 | down |
| -1.5619316 | 1.57640424 | -3.8013814 | 0.00072207 | 0.9758208 | -1.4141591 | ATP6V0B | down |
| -1.3195661 | 2.137621 | -3.7621801 | 0.00080089 | 0.9758208 | -1.4719389 | EVC2 | down |
| 1.49212302 | 1.04591383 | 3.7513067 | 0.0008242 | 0.9758208 | -1.4879622 | SULT1A2 | up |
| 1.09271133 | 0.8060486 | 3.73652903 | 0.00085695 | 0.9758208 | -1.509736 | WDR89 | up |

| **Supplementary Table 9. Differential gene expression between CR and non-CR at baseline** | | | | | | | |
| --- | --- | --- | --- | --- | --- | --- | --- |
| logFC | AveExpr | t | P.Value | adj.P.Val | B | gene | change |
| -2.0043694 | 2.00052097 | -5.6760342 | 4.54E-06 | 0.22951538 | 1.31086993 | LINC00881 | down |
| -2.2088301 | 2.0530357 | -5.4847753 | 7.61E-06 | 0.22951538 | 1.05357288 | SYT3 | down |
| -1.7520249 | 1.06668315 | -4.9585707 | 3.18E-05 | 0.54634505 | 0.32038364 | CLEC2L | down |
| -1.8973001 | 2.54535257 | -4.9106641 | 3.62E-05 | 0.54634505 | 0.25196961 | ZNF316 | down |
| -1.5888762 | 2.03412699 | -4.788341 | 5.05E-05 | 0.60977009 | 0.07617598 | POTEC | down |
| -1.4383315 | 0.79030395 | -4.4210203 | 0.00013706 | 0.95221992 | -0.4600171 | PLD6 | down |
| -1.5904821 | 1.0340683 | -4.4139897 | 0.0001397 | 0.95221992 | -0.4703826 | BASP1 | down |
| -1.481447 | 1.07597964 | -4.2715452 | 0.00020532 | 0.95221992 | -0.6810466 | AL353660.1 | down |
| -1.5745705 | 1.65585545 | -4.2417048 | 0.00022252 | 0.95221992 | -0.7253192 | GSN-AS1 | down |
| -1.7360098 | 2.36535517 | -4.2298615 | 0.00022974 | 0.95221992 | -0.7429024 | ARNTL | down |
| -1.3902372 | 1.95937284 | -4.2090216 | 0.00024301 | 0.95221992 | -0.7738578 | SPRYD4 | down |
| -1.189869 | 0.83859569 | -4.1164231 | 0.00031172 | 0.95221992 | -0.9116179 | TEX30 | down |
| -1.5926579 | 2.30916226 | -4.0595061 | 0.00036312 | 0.95221992 | -0.996439 | AC245060.6 | down |
| -1.3536215 | 2.41815796 | -4.0425794 | 0.00037996 | 0.95221992 | -1.0216811 | GTF3C4 | down |
| -1.1506601 | 0.60009512 | -4.0199043 | 0.00040372 | 0.95221992 | -1.0555061 | NPM1P13 | down |
| -0.7961253 | 0.47699969 | -3.9817385 | 0.00044707 | 0.95221992 | -1.1124617 | AL596211.1 | stable |
| -1.3628595 | 1.21017068 | -3.9717019 | 0.00045921 | 0.95221992 | -1.1274436 | AC021134.1 | down |
| -1.3343666 | 1.27381187 | -3.904393 | 0.00054941 | 0.95221992 | -1.227947 | C20orf96 | down |
| 1.45265295 | 1.867759 | 3.89999092 | 0.00055588 | 0.95221992 | -1.2345213 | LINC01940 | up |
| 1.21226742 | 0.79375586 | 3.89979916 | 0.00055616 | 0.95221992 | -1.2348077 | LARP4P | up |
| -1.3805049 | 1.52950416 | -3.8671121 | 0.00060663 | 0.95221992 | -1.2836259 | LINC00337 | down |
| 1.20233421 | 0.71521697 | 3.84614228 | 0.00064135 | 0.95221992 | -1.3149445 | ZFYVE9P1 | up |
| -1.3193805 | 1.03639488 | -3.8409213 | 0.00065029 | 0.95221992 | -1.3227419 | AP005717.1 | down |
| -0.9869087 | 0.51539612 | -3.8290446 | 0.00067108 | 0.95221992 | -1.340479 | KANK1P1 | stable |
| -1.5461119 | 1.59694056 | -3.8103614 | 0.00070512 | 0.95221992 | -1.3683794 | PARP3 | down |
| -1.3138723 | 1.03693122 | -3.7978173 | 0.00072892 | 0.95221992 | -1.3871104 | AC106798.1 | down |
| -1.1433294 | 3.0495943 | -3.7727434 | 0.00077887 | 0.95221992 | -1.424546 | RBM25 | down |
| -1.2799674 | 1.15892165 | -3.7643317 | 0.00079636 | 0.95221992 | -1.4371028 | AC016813.2 | down |
| -0.9605542 | 0.64054145 | -3.7513066 | 0.00082421 | 0.95221992 | -1.4565445 | LINC00440 | stable |
| -1.3752266 | 1.40675618 | -3.7503822 | 0.00082623 | 0.95221992 | -1.4579241 | FRS3 | down |
| -1.3904714 | 1.57842401 | -3.738128 | 0.00085336 | 0.95221992 | -1.4762121 | FAM155B | down |
| -1.5028351 | 2.15283639 | -3.7337376 | 0.00086329 | 0.95221992 | -1.4827635 | THEM4 | down |
| -1.2504427 | 2.82863927 | -3.7333451 | 0.00086419 | 0.95221992 | -1.4833493 | CHST9 | down |
| -0.7917366 | 4.12945367 | -3.7316426 | 0.00086807 | 0.95221992 | -1.4858898 | DNAH7 | stable |
| -1.4863822 | 1.55229888 | -3.7290228 | 0.00087408 | 0.95221992 | -1.4897987 | TSNAX | down |
| -1.0175705 | 3.40331869 | -3.7220878 | 0.0008902 | 0.95221992 | -1.5001459 | RUBCNL | down |
| -1.5379193 | 1.695012 | -3.7096641 | 0.00091979 | 0.95221992 | -1.5186797 | ZMAT1 | down |
| -0.9959615 | 0.59230415 | -3.7055326 | 0.00092984 | 0.95221992 | -1.5248422 | LINC00051 | stable |
| -1.2798125 | 2.95840219 | -3.7035907 | 0.00093461 | 0.95221992 | -1.5277386 | ARHGEF4 | down |

**Supplementary Table 10. Clinical information of AML scRNA samples**

| Dataset | label | group | Response | status | Sample ID | source |
| --- | --- | --- | --- | --- | --- | --- |
| GSE130756 | GSM3753194 | AML | CR | diagnosis | P03 | Bone marrow aspirate from AML patient |
| GSE130756 | GSM4135774 | AML | nonCR | diagnosis | P04 | Bone marrow aspirate from AML patient |
| GSE130756 | GSM4135781 | AML | CR | diagnosis | P10 | Bone marrow aspirate from AML patient |
| GSE130756 | GSM4135787 | AML | nonCR | diagnosis | P16 | Bone marrow aspirate from AML patient |
| GSE130756 | GSM4135789 | AML | nonCR | diagnosis | P18 | Bone marrow aspirate from AML patient |
| GSE130756 | GSM4135790 | AML | CR | diagnosis | P19 | Bone marrow aspirate from AML patient |
| GSE130756 | GSM4135791 | AML | CR | diagnosis | P20 | Bone marrow aspirate from AML patient |
| GSE130756 | GSM4135795 | AML | CR | diagnosis | P23 | Bone marrow aspirate from AML patient |
| GSE130756 | GSM4135796 | AML | CR | diagnosis | P24 | Bone marrow aspirate from AML patient |
| GSE130756 | GSM4135797 | AML | CR | diagnosis | P25 | Bone marrow aspirate from AML patient |
| GSE130756 | GSM4135798 | AML | CR | diagnosis | P26 | Bone marrow aspirate from AML patient |
| GSE130756 | GSM4135799 | AML | CR | diagnosis | P27 | Bone marrow aspirate from AML patient |
| GSE130756 | GSM4135803 | AML | CR | diagnosis | P31 | Bone marrow aspirate from AML patient |
| GSE130756 | GSM4135804 | AML | CR | diagnosis | P32 | Bone marrow aspirate from AML patient |
| GSE130756 | GSM4135807 | AML | CR | diagnosis | P35 | Bone marrow aspirate from AML patient |
| GSE130756 | GSM4135811 | AML | CR | diagnosis | P39 | Bone marrow aspirate from AML patient |
| GSE130756 | GSM4135812 | AML | CR | diagnosis | P40 | Bone marrow aspirate from AML patient |
| GSE198681 | GSM5954928 | AML | nonCR | diagnosis | AML 5 | Bone marrow aspirate from AML patient |
| GSE198681 | GSM5954926 | AML | nonCR | diagnosis | AML0 | Bone marrow aspirate from AML patient |
| GSE198681 | GSM5954924 | AML | CR | diagnosis | AML2 | Bone marrow aspirate from AML patient |

**Supplementary Table 11. Cell subtype-defining signature genes**

| feature | group | avgExpr | logFC | statistic | auc | pval | padj | pct_in | pct_out |
| --- | --- | --- | --- | --- | --- | --- | --- | --- | --- |
| A1BG | B | 0.3310686 | -0.0637852 | 166683372.5 | 0.46433579 | 5.18E-15 | 2.06E-14 | 20.4859813 | 29.9944111 |
| A1BG-AS1 | B | 0.03950378 | 0.01179526 | 179520380 | 0.5000963 | 0.95085615 | 0.96085834 | 2.61682243 | 2.62975521 |
| A2M | B | 0.00610927 | -0.005356 | 179143775 | 0.49904717 | 0.26803996 | 0.32575861 | 0.59813084 | 0.78616938 |
| A2M-AS1 | B | 0.02049073 | -0.015915 | 177530554 | 0.49455317 | 0.00041495 | 0.00082722 | 1.4953271 | 2.58355378 |
| A2ML1 | B | 0 | -0.0006713 | 179356075 | 0.49963859 | 0.1642224 | 0.21690337 | 0 | 0.07228287 |
| A4GALT | B | 0.00151501 | -0.0082403 | 177983140.5 | 0.49581395 | 1.22E-05 | 2.77E-05 | 0.14953271 | 0.98662394 |
| AAAS | B | 0.08997443 | -0.0268122 | 172578358 | 0.48075766 | 6.98E-11 | 2.22E-10 | 6.1682243 | 10.2038079 |
| AACS | B | 0.0254048 | -0.0234909 | 174761241 | 0.48683859 | 1.16E-10 | 3.66E-10 | 1.98130841 | 4.63504602 |
| AADAT | B | 0.00061299 | -0.0055533 | 178412357 | 0.49700964 | 0.00010039 | 0.00021178 | 0.03738318 | 0.63564216 |
| AAED1 | B | 0.00190105 | -0.0025525 | 179297673 | 0.49947589 | 0.20225781 | 0.25908278 | 0.07476636 | 0.1795894 |
| AAGAB | B | 0.08075646 | -0.0380474 | 170972930.5 | 0.47628536 | 1.57E-15 | 6.41E-15 | 5.45794393 | 10.4079884 |
| AAK1 | B | 0.2456846 | -0.5898202 | 112517513 | 0.31344403 | 7.55E-270 | 7.77E-268 | 15.588785 | 52.6994299 |
| AAMDC | B | 0.07670646 | -0.1210625 | 158438028 | 0.44136644 | 4.80E-58 | 7.79E-57 | 4.82242991 | 16.812847 |
| AAMP | B | 0.18351612 | -0.0422726 | 169076111.5 | 0.47100133 | 5.44E-14 | 2.05E-13 | 12.4859813 | 19.0960915 |
| AANAT | B | 0.00070909 | -0.0002143 | 179388455 | 0.49972879 | 0.35584135 | 0.41073984 | 0.03738318 | 0.09165766 |
| AAR2 | B | 0.03123937 | -0.0387593 | 172400981 | 0.48026353 | 4.87E-17 | 2.14E-16 | 2.28037383 | 6.25731212 |
| AARD | B | 0.00052741 | -0.0001901 | 179448600 | 0.49989634 | 0.65843699 | 0.70466936 | 0.03738318 | 0.05812437 |
| AARS | B | 0.08032909 | 0.01615869 | 178825873.5 | 0.49816158 | 0.41975531 | 0.47579146 | 5.30841121 | 5.78262976 |
| AARS2 | B | 0.02850271 | -0.0115065 | 176634245 | 0.49205629 | 2.20E-05 | 4.90E-05 | 2.24299065 | 3.85185737 |
| AARSD1 | B | 0.12806536 | -0.0253684 | 171536360 | 0.47785493 | 4.89E-11 | 1.57E-10 | 8.85981308 | 13.7896345 |
| AASDH | B | 0.09912384 | -0.0088806 | 174815099 | 0.48698863 | 5.02E-06 | 1.18E-05 | 6.57943925 | 9.43477775 |
| AASDHPPT | B | 0.21094826 | 0.00249139 | 174441724 | 0.4859485 | 0.00014815 | 0.00030716 | 13.5327103 | 17.2398375 |
| AASS | B | 0.01715 | 0.00988989 | 180480468.5 | 0.50277085 | 0.00018624 | 0.00038316 | 1.12149533 | 0.56932076 |
| AATBC | B | 0.00290327 | -0.0155848 | 176842443 | 0.49263627 | 5.74E-09 | 1.63E-08 | 0.26168224 | 1.73478893 |
| AATF | B | 0.2879819 | -0.0674065 | 165644298 | 0.4614412 | 6.50E-18 | 2.97E-17 | 18.6542056 | 28.3497895 |
| AATK | B | 0.00746966 | -0.0171594 | 176452581.5 | 0.49155022 | 3.22E-09 | 9.30E-09 | 0.52336449 | 2.21766832 |
| AB019441.29 | B | 0.01729153 | -0.0121205 | 178514240 | 0.49729346 | 0.00993062 | 0.01688117 | 0.63551402 | 1.18037185 |
| ABALON | B | 0.00091824 | -0.0027941 | 179035577 | 0.49874576 | 0.02308845 | 0.03710402 | 0.07476636 | 0.32564552 |
| ABAT | B | 0.04435599 | -0.0093015 | 176087914 | 0.49053435 | 5.90E-06 | 1.37E-05 | 2.87850467 | 4.84667834 |
| ABCA1 | B | 0.05532958 | -0.0704417 | 167574225 | 0.46681747 | 2.60E-29 | 1.94E-28 | 3.47663551 | 10.2686389 |
| ABCA10 | B | 0.00221881 | -8.75E-05 | 179452270 | 0.49990656 | 0.83254662 | 0.85949313 | 0.18691589 | 0.20567085 |
| ABCA13 | B | 0.00798815 | -0.0205443 | 176933725.5 | 0.49289056 | 1.72E-08 | 4.74E-08 | 0.29906542 | 1.72435635 |
| ABCA2 | B | 0.02117439 | -0.0544321 | 170677513 | 0.47546241 | 2.54E-24 | 1.55E-23 | 1.68224299 | 6.61127464 |
| ABCA3 | B | 0.01065515 | 7.87E-05 | 179101894 | 0.4989305 | 0.25195087 | 0.31017718 | 0.71028037 | 0.9270092 |
| ABCA5 | B | 0.04427457 | 0.00213334 | 178347441 | 0.4968288 | 0.07888171 | 0.11403531 | 2.87850467 | 3.55378367 |
| ABCA6 | B | 0.00419115 | -0.0034203 | 178811797.5 | 0.49812237 | 0.01821232 | 0.02978895 | 0.29906542 | 0.67513693 |
| ABCA7 | B | 0.10632589 | -0.0179898 | 173968059 | 0.484629 | 2.50E-07 | 6.42E-07 | 7.06542056 | 10.4176758 |
| ABCA8 | B | 0 | -0.0024871 | 179077875 | 0.49886359 | 0.01356969 | 0.02261876 | 0 | 0.2272812 |
| ABCA9 | B | 0.00083429 | -0.0049886 | 178623682 | 0.49759833 | 0.00054345 | 0.00106979 | 0.03738318 | 0.51790305 |
| ABCA9-AS1 | B | 0 | -0.0021173 | 179214300 | 0.49924364 | 0.04410599 | 0.06733272 | 0 | 0.1512724 |
| ABCB1 | B | 0.02671643 | -0.0302995 | 173979717 | 0.48466147 | 4.43E-13 | 1.59E-12 | 1.90654206 | 5.00763814 |
| ABCB10 | B | 0.05055039 | -0.0493363 | 170292262.5 | 0.4743892 | 5.44E-21 | 2.87E-20 | 3.36448598 | 8.58899363 |
| ABCB11 | B | 0.00108143 | -0.0011417 | 179241680 | 0.49931991 | 0.12648669 | 0.17311036 | 0.07476636 | 0.21088714 |
| ABCB4 | B | 0.0855927 | 0.08429124 | 187991456 | 0.52369447 | 0 | 0 | 4.85981308 | 0.12519095 |
| ABCB5 | B | 0 | -0.0008461 | 179368112.5 | 0.49967212 | 0.1852163 | 0.24035075 | 0 | 0.06557621 |
| ABCB6 | B | 0.01168282 | -0.0107396 | 177690970.5 | 0.49500004 | 0.00027904 | 0.00056467 | 1.04672897 | 2.04627594 |
| ABCB7 | B | 0.10032829 | -0.0716633 | 165438921 | 0.46086908 | 1.17E-28 | 8.50E-28 | 7.14018692 | 15.3828384 |
| ABCB8 | B | 0.07697459 | 0.01013555 | 178800846 | 0.49809186 | 0.41633398 | 0.47258702 | 5.68224299 | 6.16192854 |
| ABCB9 | B | 0.05995571 | 0.04825473 | 184655991 | 0.51440275 | 4.55E-42 | 5.03E-41 | 4 | 1.13640598 |
| ABCC1 | B | 0.07335544 | -0.1035097 | 161646436 | 0.45030422 | 1.00E-44 | 1.20E-43 | 5.42056075 | 15.6131003 |
| ABCC10 | B | 0.0269538 | -0.0082046 | 177080468 | 0.49329935 | 8.14E-05 | 0.00017292 | 1.79439252 | 3.15734565 |
| ABCC11 | B | 0.00059972 | -0.000484 | 179434070 | 0.49985586 | 0.64536573 | 0.69302813 | 0.07476636 | 0.10358061 |
| ABCC2 | B | 0.00311241 | -0.0009385 | 179338967 | 0.49959093 | 0.47290707 | 0.52850544 | 0.26168224 | 0.34352994 |
| ABCC3 | B | 0.00491914 | -0.0076269 | 178244638 | 0.49654242 | 0.0003206 | 0.00064548 | 0.29906542 | 0.99184023 |
| ABCC4 | B | 0.0359144 | -0.0262137 | 174843828 | 0.48706866 | 6.65E-09 | 1.89E-08 | 2.95327103 | 5.56503596 |
| ABCC5 | B | 0.04383055 | -0.0410326 | 171538922 | 0.47786207 | 5.04E-18 | 2.32E-17 | 2.99065421 | 7.48984686 |
| ABCC6 | B | 0.00318811 | -0.0127377 | 177163556 | 0.49353081 | 3.20E-08 | 8.70E-08 | 0.18691589 | 1.48217147 |
| ABCD1 | B | 0.01992192 | -0.0395676 | 172242213 | 0.47982125 | 6.61E-20 | 3.33E-19 | 1.42056075 | 5.48679161 |
| ABCD2 | B | 0.01954544 | 0.00301771 | 180462021 | 0.50271946 | 0.00768298 | 0.01327568 | 1.64485981 | 1.09318529 |
| ABCD3 | B | 0.06705333 | -0.049292 | 170252919 | 0.4742796 | 2.15E-18 | 1.01E-17 | 4.85981308 | 10.1441932 |
| ABCD4 | B | 0.09955517 | -0.0389211 | 170473285 | 0.47489348 | 2.93E-15 | 1.18E-14 | 6.76635514 | 12.0973211 |
| ABCE1 | B | 0.27071636 | -0.0648524 | 166429878 | 0.46362962 | 5.87E-17 | 2.57E-16 | 17.1962617 | 26.1619285 |
| ABCF1 | B | 0.35841312 | -0.0701301 | 166098018 | 0.46270515 | 1.34E-15 | 5.51E-15 | 22.1308411 | 32.1986661 |
| ABCF2 | B | 0.08183305 | -0.0218158 | 173156757 | 0.48236893 | 7.02E-10 | 2.11E-09 | 5.79439252 | 9.51451246 |
| ABCF3 | B | 0.0884651 | 0.00370696 | 177058753 | 0.49323885 | 0.00806222 | 0.01388106 | 5.86915888 | 7.38999218 |
| ABCG1 | B | 0.09720989 | 0.01522454 | 177977054.5 | 0.495797 | 0.09584694 | 0.13532058 | 6.13084112 | 7.20742204 |
| ABCG2 | B | 0.00397821 | -0.0054601 | 178306473 | 0.49671467 | 0.00021213 | 0.00043441 | 0.18691589 | 0.84503894 |
| ABCG8 | B | 0.00029246 | -0.0021725 | 179100800 | 0.49892746 | 0.02709861 | 0.04305644 | 0.03738318 | 0.25187228 |
| ABHD1 | B | 0.00234722 | -0.0047132 | 178688952 | 0.49778016 | 0.00384298 | 0.00689941 | 0.18691589 | 0.63117106 |
| ABHD10 | B | 0.09892779 | -0.0138979 | 174292975.5 | 0.48553413 | 6.41E-07 | 1.60E-06 | 6.69158879 | 9.84537427 |
| ABHD11 | B | 0.04787643 | -0.0078822 | 176317801 | 0.49117476 | 4.38E-05 | 9.53E-05 | 3.36448598 | 5.19020828 |
| ABHD12 | B | 0.08774283 | -0.0363625 | 171352847 | 0.47734371 | 1.70E-13 | 6.24E-13 | 6.46728972 | 11.191177 |
| ABHD12B | B | 0.0003326 | -0.0077956 | 177957289 | 0.49574194 | 2.73E-06 | 6.53E-06 | 0.03738318 | 0.88900481 |

**Supplementary Table 12. spaCET deconvolution results**

| V1 | T | NK | B | HSCP | DC | Ery | Mono | Neutrophil |
| --- | --- | --- | --- | --- | --- | --- | --- | --- |
| AAACCTAAGCAGCCGG-1 | 1.46E-07 | 0.0725334 | 0.23670751 | 2.33E-05 | 0.63829289 | 0.05218741 | 2.14E-08 | 0.0002553 |
| AAACTGCTGGCTCCAA-1 | 2.12E-07 | 7.10E-06 | 0.00179061 | 2.26E-06 | 0.3630713 | 0.3638167 | 0.11631192 | 0.1549999 |
| AAAGGGCAGCTTGAAT-1 | 8.35E-08 | 1.20E-06 | 0.08015746 | 7.59E-05 | 0.30880622 | 0.29007306 | 0.20545629 | 0.11542976 |
| AAATACCTATAAGCAT-1 | 1.34E-07 | 0.13566466 | 3.13E-07 | 0.31549308 | 2.67E-06 | 0.22306714 | 0.32574654 | 2.55E-05 |
| AAATAGGGTGCTATTG-1 | 1.12E-05 | 7.45E-08 | 1.48E-06 | 0.00011127 | 0.02445914 | 0.05051623 | 0.92482153 | 7.90E-05 |
| AAATCGTGTACCACAA-1 | 1.95E-07 | 1.82E-05 | 0.13476989 | 1.89E-05 | 2.10E-05 | 0.77863074 | 1.38E-05 | 0.08652726 |
| AAATGGTCAATGTGCC-1 | 8.63E-07 | 3.14E-07 | 0.0851233 | 4.32E-05 | 2.90E-06 | 0.67039105 | 0.08863584 | 0.15580254 |
| AAATTAACGGGTAGCT-1 | 2.47E-07 | 0.00661747 | 0.04063606 | 5.51E-08 | 0.5117209 | 0.18717502 | 0.0380548 | 0.21579544 |
| AACAACTGGTAGTTGC-1 | 1.95E-08 | 0.02223937 | 0.07495893 | 9.98E-06 | 0.00194961 | 0.61639217 | 0.17349437 | 0.11095555 |
| AACAATTACTCTACGC-1 | 0.00014123 | 2.34E-06 | 0.00122925 | 7.14E-07 | 0.00432797 | 0.82124811 | 0.10339579 | 0.06965459 |
| AACAGGATGGGCCGCG-1 | 0.00015152 | 0.0353315 | 3.79E-05 | 1.03E-06 | 0.00030992 | 0.58328364 | 0.29204648 | 0.08883801 |
| AACCAAGACTTCTCTG-1 | 1.24E-08 | 0.00069367 | 0.10061264 | 2.22E-05 | 0.35342625 | 0.25212574 | 0.0839911 | 0.20912836 |
| AACCTCGCTTTAGCCC-1 | 1.02E-09 | 0.10681868 | 0.13887075 | 0.05302653 | 0.09911645 | 0.28358089 | 0.18356599 | 0.13502071 |
| AACCTTTAAATACGGT-1 | 0.00351227 | 0.00322664 | 1.83E-10 | 6.17E-05 | 0.34847166 | 0.24906881 | 0.21877113 | 0.17688775 |
| AACGATAATGCCGTAG-1 | 0.07440513 | 0.00077826 | 2.44E-06 | 0.00044818 | 0.31453066 | 0.00329175 | 0.60651938 | 2.42E-05 |
| AACGGACGTACGTATA-1 | 1.05E-06 | 0.08552021 | 0.00134021 | 8.82E-05 | 0.81169031 | 0.06470385 | 0.00033073 | 0.03632542 |
| AACGTCAGACTAGTGG-1 | 7.69E-09 | 3.28E-08 | 0.06141763 | 1.53E-06 | 1.43E-07 | 0.56190815 | 0.27688776 | 0.09978474 |
| AACGTGCGAAAGTCTC-1 | 7.33E-05 | 3.13E-07 | 0.00892877 | 1.52E-06 | 0.15830831 | 0.52174877 | 0.02916596 | 0.28177303 |
| AACTAGGCTTGGGTGT-1 | 0.00604388 | 0.00277085 | 0.27872513 | 0.00010664 | 0.00010545 | 0.0307392 | 0.68139833 | 0.00011052 |
| AACTCAAGTTAATTGC-1 | 7.78E-09 | 0.08727301 | 0.00176988 | 0.00827173 | 0.32694509 | 0.45786097 | 0.10687692 | 0.01100239 |
| AACTTGCCCGTATGCA-1 | 8.99E-08 | 0.09165989 | 0.04667896 | 0.00014321 | 0.17699141 | 0.41717411 | 0.23234168 | 0.03501064 |
| AAGACTGCAAGCTACT-1 | 4.41E-06 | 0.00831087 | 4.41E-05 | 1.29E-06 | 0.37849172 | 0.53478464 | 1.86E-06 | 0.07836111 |
| AAGAGATGAATCGGTA-1 | 2.42E-06 | 9.52E-08 | 0.02494988 | 2.74E-06 | 0.00041336 | 0.81501666 | 0.15709251 | 0.00252234 |
| AAGCACCCTGCGTATC-1 | 2.14E-06 | 1.72E-06 | 6.77E-07 | 0.00011384 | 1.11E-06 | 0.98719016 | 0.01268938 | 9.79E-07 |
| AAGCATACTCTCCTGA-1 | 0.04355585 | 1.88E-07 | 0.11027463 | 3.42E-07 | 9.62E-06 | 0.31967212 | 0.52036228 | 0.00612497 |
| AAGCTAGATCGAGTAA-1 | 0.00013378 | 8.12E-08 | 0.00603651 | 1.97E-06 | 0.00012287 | 0.55589803 | 0.07616057 | 0.36164618 |
| AAGCTCGTGCCAAGTC-1 | 3.90E-07 | 3.99E-08 | 1.22E-07 | 1.03E-06 | 0.1233082 | 0.35020939 | 0.3973001 | 0.12918073 |
| AAGCTCTTTCATGGTG-1 | 0.01917707 | 3.26E-05 | 0.07663302 | 3.98E-07 | 0.48959092 | 0.41455984 | 5.51E-06 | 6.70E-07 |
| AAGGAGCGGTTGGTGC-1 | 4.48E-08 | 0.01087704 | 0.01297919 | 0.07845107 | 0.15319302 | 0.56312099 | 5.76E-06 | 0.18137289 |
| AAGGCGCGTAAAGCTT-1 | 2.27E-05 | 3.96E-06 | 0.05809747 | 1.79E-05 | 0.00424788 | 0.83350899 | 0.00030854 | 0.1037926 |
| AAGGCTGTGCTCATCG-1 | 0.02177609 | 1.41E-08 | 0.05964294 | 4.12E-07 | 0.38234152 | 0.414318 | 0.05713834 | 0.06478267 |
| AAGGTGATAAACCAGC-1 | 0.00214276 | 0.33844307 | 0.30561563 | 0.00592274 | 2.72E-05 | 0.27406798 | 0.07378055 | 7.59E-08 |
| AAGTAGTGACGCGAGG-1 | 3.30E-05 | 1.95E-06 | 0.04790076 | 8.80E-06 | 0.00880062 | 0.52135149 | 0.13065513 | 0.29124828 |
| AAGTGTTTGGAGACGG-1 | 2.48E-07 | 1.29E-07 | 2.45E-06 | 0.66390787 | 7.48E-05 | 0.29003959 | 0.04597265 | 2.29E-06 |
| AAGTTCACTCCAAGCT-1 | 2.55E-05 | 3.85E-08 | 3.71E-05 | 0.66842587 | 1.41E-06 | 0.08862213 | 0.15766584 | 0.08522212 |
| AATAACAACGCTCGGC-1 | 4.79E-07 | 0.00524386 | 0.28483721 | 0.00173431 | 0.44386788 | 0.03939743 | 6.83E-07 | 0.22491815 |
| AATACAATGTTTCAGG-1 | 2.52E-07 | 0.02468752 | 0.03915881 | 0.00027566 | 0.56824825 | 0.23393806 | 0.13369123 | 2.21E-07 |
| AATAGAATCTGTTTCA-1 | 0.37097931 | 6.32E-07 | 5.19E-05 | 8.84E-07 | 0.11781095 | 0.04302387 | 0.46810129 | 3.11E-05 |
| AATGACGTAGGATGTC-1 | 1.06E-06 | 1.10E-05 | 0.07414412 | 0.25518435 | 0.2229247 | 0.23002793 | 0.04701661 | 0.17069025 |
| AATGACTGTCAGCCGG-1 | 3.73E-09 | 1.77E-07 | 1.35E-07 | 7.27E-07 | 0.25955293 | 0.39200931 | 0.18053038 | 0.16790633 |
| AATGGTTCTCACAAGC-1 | 1.26E-07 | 0.03485722 | 0.05835322 | 0.00749816 | 6.13E-07 | 0.52575659 | 0.21228177 | 0.16125229 |
| AATTAAAGGTCGGCGT-1 | 1.53E-06 | 1.81E-09 | 0.08046054 | 6.96E-07 | 5.43E-07 | 0.50468587 | 0.32425924 | 0.09059158 |
| AATTAGCGCTGCAGCG-1 | 4.61E-06 | 3.15E-05 | 0.20125347 | 0.59093011 | 1.16E-06 | 7.29E-07 | 0.20777726 | 1.13E-06 |
| AATTCTAGAGTTAGGC-1 | 6.27E-07 | 0.00020309 | 0.0003814 | 6.37E-06 | 0.99870312 | 0.0005193 | 0.00016444 | 2.17E-05 |
| AATTGAACGCTCTGGT-1 | 0.00035933 | 2.96E-08 | 0.05346201 | 0.00221012 | 0.01287542 | 0.80026631 | 0.13082455 | 2.22E-06 |
| ACAAATCGCACCGAAT-1 | 9.99E-05 | 0.00163149 | 9.87E-05 | 0.00064463 | 0.0002931 | 0.9959983 | 8.26E-08 | 0.0012338 |
| ACAAATGGTAGTGTTT-1 | 0.00070145 | 2.14E-08 | 6.46E-07 | 0.0599424 | 0.06903397 | 0.72742455 | 0.14289678 | 1.91E-07 |
| ACAACGGTCCCTGCGA-1 | 1.91E-08 | 5.62E-06 | 0.1062869 | 8.15E-06 | 0.36862723 | 0.3309139 | 0.01051604 | 0.18364214 |
| ACAAGCAGTGCCTAGC-1 | 1.54E-07 | 0.02343097 | 0.03021228 | 1.21E-06 | 0.31655123 | 0.36437887 | 0.24974663 | 0.01567866 |
| ACAAGGAAATCCGCCC-1 | 0.00100848 | 2.55E-06 | 1.47E-05 | 0.82144976 | 2.70E-05 | 0.17739296 | 9.58E-08 | 0.00010451 |
| ACAAGGACAAGAGGTT-1 | 3.67E-05 | 1.99E-09 | 0.02603407 | 1.18E-06 | 1.77E-06 | 0.59612448 | 0.21617743 | 0.16162439 |
| ACAAGGATGCTTTAGG-1 | 0.0001597 | 1.82E-06 | 0.00018426 | 0.22942246 | 0.00105974 | 0.52751809 | 5.26E-05 | 0.24160136 |
| ACAAGGGCAGGCTCTG-1 | 2.45E-07 | 0.02282744 | 0.0126561 | 0.00606279 | 0.05783379 | 0.63281064 | 0.15404429 | 0.11376471 |
| ACAATCCATTTAAACC-1 | 8.60E-05 | 6.04E-05 | 2.01E-06 | 1.62E-08 | 9.48E-06 | 0.60034817 | 0.06598244 | 0.33351147 |
| ACACACCAGGACCAGT-1 | 0.99777342 | 4.18E-07 | 2.07E-06 | 0.00023572 | 9.33E-05 | 0.00187422 | 2.06E-05 | 2.53E-07 |
| ACACCCAGCATGCAGC-1 | 1.78E-07 | 0.05502485 | 0.02781058 | 3.07E-07 | 0.08182006 | 0.34459901 | 0.31976497 | 0.17098005 |
| ACACCCGAGAAATCCG-1 | 2.79E-06 | 1.25E-08 | 0.0903516 | 2.02E-07 | 0.19813764 | 0.52653159 | 0.10228324 | 0.08269292 |
| ACACCTTAAGTAGGGC-1 | 0.00064082 | 0.0041173 | 0.20267169 | 0.01289995 | 0.36451235 | 0.40869397 | 0.00148357 | 0.00498035 |
| ACATCGATCGTTTACC-1 | 1.28E-07 | 7.23E-09 | 0.10179596 | 4.70E-07 | 0.00052895 | 0.63853347 | 0.25913948 | 1.54E-06 |
| ACATCGTATGCAATGG-1 | 1.79E-05 | 1.13E-06 | 0.24882148 | 3.88E-05 | 0.41329238 | 0.18937322 | 0.11756095 | 0.0308941 |
| ACATTAGTTTATATCC-1 | 1.35E-07 | 2.50E-08 | 1.32E-07 | 1.76E-06 | 0.06734853 | 0.35612926 | 0.29667956 | 0.2798406 |
| ACCAATATGCAAGTTA-1 | 1.56E-05 | 1.55E-06 | 3.44E-07 | 0.26584865 | 0.07362304 | 0.00194345 | 0.65806091 | 0.00050644 |
| ACCACAAGTTTCTATC-1 | 8.39E-07 | 0.00289905 | 7.24E-08 | 8.74E-09 | 8.70E-07 | 0.7801101 | 0.07862388 | 0.13836518 |
| ACCACGTGCAGCTATA-1 | 4.11E-07 | 0.30350892 | 1.11E-06 | 4.37E-06 | 2.11E-07 | 0.23145277 | 0.07948438 | 0.38554782 |
| ACCATATCCGCAATAA-1 | 1.86E-07 | 0.07379346 | 0.00784922 | 3.64E-06 | 0.11920567 | 0.51973605 | 0.18018 | 0.09923178 |
| ACCCATCTTGAGGGTA-1 | 0.00013512 | 4.09E-09 | 0.01920791 | 0.00127467 | 2.79E-06 | 0.80007905 | 0.10398102 | 0.07531943 |
| ACCCTCCCTTGCTATT-1 | 8.61E-05 | 1.41E-05 | 3.98E-07 | 4.71E-07 | 2.03E-07 | 0.66280407 | 5.45E-05 | 0.33704024 |
| ACCGCAATAACTGCCT-1 | 2.24E-07 | 1.88E-06 | 0.12922139 | 1.68E-05 | 2.20E-05 | 0.02170537 | 0.70786769 | 0.14116457 |
| ACCTAATCGACTTCCT-1 | 3.19E-06 | 6.09E-08 | 0.07297359 | 0.00012427 | 0.06559668 | 0.31054591 | 0.24624127 | 0.30451501 |
| ACGAAATGGGCGGCAC-1 | 7.08E-06 | 0.07857875 | 3.21E-05 | 4.03E-06 | 0.15730597 | 0.55303978 | 0.1956574 | 0.01537484 |
| ACGATGCATATGTTAT-1 | 7.05E-07 | 0.04612254 | 0.08310774 | 1.00E-07 | 0.11867562 | 0.48277197 | 0.13356108 | 0.13576024 |
| ACGCATTCGTGAGTAC-1 | 5.35E-06 | 9.64E-08 | 0.16170207 | 0.00012743 | 0.34211698 | 0.27736246 | 0.13384545 | 0.08484016 |
| ACGCCGCTAGACGACC-1 | 5.58E-05 | 0.08571146 | 0.09664951 | 6.67E-06 | 0.16779053 | 0.2337675 | 0.16895586 | 0.24706266 |
| ACGCGAAGTCAGACGA-1 | 1.46E-07 | 0.04207812 | 0.08122557 | 8.20E-07 | 0.00337498 | 0.47230846 | 0.30100296 | 0.10000894 |
| ACGCGGGCCAAGGACA-1 | 2.89E-05 | 0.00589631 | 0.03019546 | 6.51E-08 | 0.03495273 | 0.55318738 | 0.22824035 | 0.14749883 |
| ACGGAATTTAGCAAAT-1 | 8.11E-09 | 0.03335187 | 0.11542211 | 0.13851238 | 0.04078141 | 0.11755124 | 0.30543084 | 0.24895015 |
| ACGGATGGTGCGGATA-1 | 1.98E-05 | 5.97E-07 | 4.29E-06 | 0.00052055 | 7.81E-06 | 0.11324619 | 0.85673956 | 0.02946117 |
| ACGGCACTTGCTTGGG-1 | 6.30E-05 | 0.04607469 | 0.01417211 | 3.83E-05 | 0.85027874 | 0.00035588 | 0.07438115 | 0.01463611 |
| ACGGCGACGATGGGAA-1 | 5.59E-06 | 6.65E-06 | 0.00068161 | 0.249892 | 3.49E-08 | 0.3480357 | 0.12118745 | 0.28019097 |
| ACGTAGATTGCTGATG-1 | 1.60E-08 | 0.10794963 | 3.57E-08 | 4.48E-08 | 0.28072649 | 0.30818359 | 0.00490188 | 0.29823831 |
| ACGTTAATGTCGAAGA-1 | 0.00118275 | 1.76E-06 | 0.08737525 | 4.05E-08 | 0.37704811 | 0.53287795 | 1.91E-05 | 0.00149504 |
| ACGTTAGATTTGCCCG-1 | 3.36E-07 | 0.04428988 | 0.01856608 | 5.84E-08 | 0.20254951 | 0.38169426 | 0.21185818 | 0.14104171 |
| ACTACCAGCTCTCTGG-1 | 4.37E-08 | 1.87E-08 | 0.07291975 | 0.00010808 | 0.52309859 | 0.22207433 | 0.11843258 | 0.06336661 |
| ACTCAAGTGCAAGGCT-1 | 0.00040388 | 0.0023488 | 3.44E-08 | 0.00525658 | 0.3627501 | 0.62921343 | 2.44E-06 | 2.47E-05 |
| ACTCCCTAATGCTAAA-1 | 1.96E-05 | 6.63E-08 | 0.13071756 | 3.54E-06 | 0.8547978 | 0.00200786 | 0.01245314 | 4.86E-07 |
| ACTCCCTAGAATAGTA-1 | 3.84E-05 | 0.01246968 | 1.65E-07 | 0.00210814 | 0.55719693 | 0.28881451 | 0.08589325 | 0.0534789 |
| ACTCTCTGACTTAGGT-1 | 8.14E-05 | 0.06512253 | 0.00715189 | 3.18E-07 | 0.41502639 | 0.17282774 | 0.33978653 | 3.22E-06 |
| ACTCTTGTATAGTAAC-1 | 2.29E-06 | 0.03315622 | 0.08490911 | 0.2491614 | 0.08718547 | 0.37954214 | 0.1279683 | 0.03807508 |
| ACTGAATGGCGAAAGT-1 | 0.10643241 | 5.36E-06 | 0.00048508 | 0.00015316 | 0.52563853 | 0.36720628 | 7.90E-05 | 1.77E-07 |
| ACTGTAGCACTTTGGA-1 | 2.65E-07 | 0.05063649 | 0.05515488 | 4.72E-07 | 0.00543883 | 0.42484342 | 0.26268846 | 0.20123718 |
| ACTGTCCAGGATTATA-1 | 0.00618403 | 0.00802159 | 0.11108636 | 5.64E-05 | 0.28765753 | 0.37341913 | 0.08497302 | 0.1286019 |
| ACTGTCTTCTTTAGAA-1 | 9.11E-07 | 0.04815703 | 0.00877157 | 0.1904602 | 0.11616446 | 0.21939467 | 0.29476091 | 0.12229024 |
| ACTTACGCATCCACGC-1 | 1.23E-05 | 1.14E-05 | 5.74E-07 | 2.26E-06 | 6.40E-05 | 0.53224467 | 0.46766162 | 3.10E-06 |
| ACTTATTAGGATCGGT-1 | 0.00011433 | 3.39E-08 | 0.14609216 | 0.00086658 | 0.10449777 | 0.56448056 | 0.12931294 | 0.05463563 |
| ACTTATTTATGTGCCA-1 | 1.79E-07 | 5.38E-08 | 2.23E-07 | 5.37E-06 | 0.33855023 | 0.47850847 | 0.18293523 | 2.48E-07 |
| ACTTCAGGCTGATCCC-1 | 0.15600223 | 0.00300631 | 0.0052289 | 0.8352321 | 4.96E-07 | 0.00041804 | 9.23E-08 | 0.00011183 |
| ACTTCCATGCGGGACA-1 | 1.13E-07 | 7.37E-06 | 4.72E-08 | 3.15E-06 | 2.42E-06 | 0.99998509 | 8.70E-08 | 1.73E-06 |
| ACTTGACTCCCTCTTT-1 | 0.11819301 | 4.79E-08 | 0.10140469 | 0.01287265 | 0.00036718 | 0.59879589 | 0.13253468 | 0.03583185 |
| ACTTGGGACCCGGTGG-1 | 3.40E-07 | 2.26E-08 | 0.03107373 | 2.39E-06 | 1.06E-07 | 0.6601372 | 0.10547415 | 0.20331205 |
| AGAAGGTTGCCGAATT-1 | 2.49E-08 | 0.45961415 | 0.00358857 | 4.91E-07 | 0.49525886 | 0.04139669 | 7.14E-05 | 6.98E-05 |
| AGAAGGTTGTAGGTCG-1 | 4.97E-06 | 3.67E-05 | 0.16457883 | 3.67E-06 | 6.29E-06 | 0.59244675 | 0.07549054 | 0.16743221 |
| AGACCATGGGATACAA-1 | 5.91E-08 | 1.03E-09 | 0.14232934 | 9.84E-08 | 0.45449242 | 0.19070545 | 0.09240306 | 0.12006957 |
| AGACCCACCGCTGATC-1 | 4.18E-07 | 3.85E-05 | 0.04992303 | 7.60E-08 | 0.00017369 | 0.61690615 | 0.13673158 | 0.19622658 |
| AGACTAGCCTTCCAGA-1 | 4.72E-06 | 0.03957366 | 0.04497047 | 1.01E-08 | 0.32916179 | 0.31259129 | 0.10920269 | 0.16449537 |
| AGAGCGTACAAGCTCG-1 | 0.01000546 | 0.01595291 | 0.02384969 | 5.78E-08 | 0.32288945 | 0.27018985 | 0.09562195 | 0.26149063 |
| AGATAACTTCAGGGCC-1 | 9.67E-08 | 4.62E-08 | 0.1324007 | 0.0007768 | 0.2140791 | 0.47204618 | 0.08024542 | 0.10045167 |
| AGATACTCAAGATCGA-1 | 8.24E-07 | 1.60E-05 | 0.1614774 | 0.16013266 | 2.05E-06 | 0.3743362 | 0.12134482 | 0.18269001 |
| AGATTATAGGACGTTT-1 | 2.75E-06 | 0.13716296 | 0.16498864 | 4.84E-08 | 0.00592761 | 0.53275626 | 0.00938542 | 0.14977631 |
| AGCAAAGGCCGCTAGT-1 | 3.30E-05 | 0.1888078 | 1.97E-06 | 0.00539295 | 0.66436798 | 0.00226991 | 0.00024878 | 0.13887761 |
| AGCACTACCGGCCTGT-1 | 0.05224124 | 1.58E-05 | 0.02505896 | 1.38E-05 | 0.23360311 | 0.37172586 | 0.19783382 | 0.11950742 |
| AGCACTACCTCACCAG-1 | 1.77E-05 | 3.12E-06 | 8.07E-05 | 8.42E-06 | 0.00020785 | 0.95459496 | 2.07E-05 | 0.0450666 |
| AGCACTTAAGGACGCC-1 | 3.33E-08 | 0.06041603 | 0.01288386 | 1.19E-08 | 0.01544975 | 0.76692811 | 0.01414781 | 0.13017439 |
| AGCGTGGTATTCTACT-1 | 0.00023644 | 5.51E-05 | 0.00011106 | 0.00219841 | 0.37335212 | 0.2460499 | 0.18691592 | 0.19108106 |
| AGCTAGAAGCAGAAGT-1 | 8.06E-08 | 1.60E-07 | 0.08748212 | 0.35217603 | 0.00074051 | 0.50306663 | 0.01625603 | 0.04027843 |
| AGCTCTTTACTCAGTT-1 | 6.63E-07 | 2.27E-07 | 0.02913584 | 0.12584871 | 0.30459966 | 0.4435752 | 2.53E-05 | 0.09681437 |
| AGGACAGTCGAATCCC-1 | 2.00E-06 | 0.05805751 | 1.03E-05 | 3.64E-05 | 0.59380286 | 2.64E-07 | 0.34807986 | 1.08E-05 |
| AGGACATCGCACGTCG-1 | 3.80E-07 | 0.02234767 | 0.02525474 | 9.78E-08 | 0.14821138 | 0.37414154 | 0.25184008 | 0.17820411 |
| AGGACGACCCATTAGA-1 | 0.12581311 | 7.18E-06 | 0.32630942 | 3.55E-07 | 9.38E-06 | 0.48579789 | 0.06074944 | 0.00131322 |
| AGGATAAAGTCGGGAT-1 | 7.98E-06 | 0.03125721 | 0.39481703 | 5.93E-05 | 0.53909836 | 1.55E-05 | 0.03473634 | 8.23E-06 |
| AGGCCACCCGTTATGA-1 | 4.81E-10 | 4.53E-06 | 0.06452796 | 3.33E-07 | 0.23187935 | 0.3760966 | 0.24321175 | 0.08427947 |
| AGGCCTGAGAATCTCG-1 | 2.12E-08 | 2.44E-06 | 0.000529 | 3.35E-06 | 0.00209291 | 0.56052709 | 1.59E-05 | 0.43682931 |
| AGGCTATGGTTAGCTT-1 | 2.58E-06 | 0.01217222 | 0.07143051 | 2.14E-06 | 0.3491496 | 0.41572725 | 0.09205914 | 0.05945655 |
| AGGGCTGCAGTTACAG-1 | 1.11E-05 | 0.02407662 | 6.62E-06 | 8.23E-06 | 0.39597254 | 0.52473149 | 0.03196687 | 0.0232265 |
| AGGGTTTAGTTCGGGA-1 | 1.49E-08 | 0.01491043 | 0.03622683 | 1.87E-07 | 0.44665241 | 0.17080718 | 0.10272825 | 0.22867471 |
| AGGTAGGTACAAAGCT-1 | 0.0018842 | 0.3008034 | 4.77E-05 | 4.36E-05 | 0.12665001 | 0.44306016 | 0.12193185 | 0.00557911 |
| AGGTGTATCGCCATGA-1 | 1.42E-06 | 8.46E-08 | 0.00029964 | 6.56E-07 | 0.19897928 | 0.47270528 | 0.2498048 | 0.07820884 |
| AGGTTTCACACACCTT-1 | 5.11E-08 | 0.08818041 | 0.16607275 | 1.75E-07 | 0.61522418 | 0.13048611 | 8.24E-06 | 2.81E-05 |
| AGTACTCTTATGCCCA-1 | 3.27E-05 | 2.88E-07 | 9.27E-05 | 0.38908224 | 0.00014716 | 0.00039607 | 0.61024562 | 3.26E-06 |
| AGTATAATACTAGGCA-1 | 1.11E-05 | 0.00020492 | 0.27846367 | 9.50E-06 | 1.51E-05 | 0.52894963 | 0.04690549 | 0.14544059 |
| AGTCAACACCACCATC-1 | 1.05E-06 | 0.00579085 | 1.39E-06 | 0.00053655 | 0.11853517 | 0.48007722 | 0.32131855 | 0.07373922 |
| AGTCAAGATGACACTT-1 | 2.73E-09 | 0.03661342 | 0.00016267 | 6.43E-06 | 0.77126452 | 0.12933833 | 3.94E-06 | 0.06261069 |
| AGTCAGCCACCGCCTG-1 | 6.19E-09 | 6.16E-05 | 0.05763828 | 2.89E-05 | 0.26827276 | 0.36179082 | 0.20974559 | 0.10246202 |
| AGTCGGCCCAAACGAC-1 | 4.60E-07 | 1.37E-05 | 0.03901077 | 3.00E-07 | 4.50E-06 | 0.65099463 | 0.09518682 | 0.21478878 |
| AGTGATAACCTGCGCG-1 | 6.59E-05 | 0.2626715 | 6.30E-07 | 0.00053613 | 0.01491767 | 0.35699232 | 0.27605636 | 0.08875946 |
| AGTGGCGTCTGAAGGT-1 | 0.00025954 | 0.00071686 | 3.21E-08 | 7.14E-07 | 5.02E-06 | 0.74349563 | 0.25547545 | 4.67E-05 |
| AGTGTGGTCTATTGTG-1 | 1.56E-08 | 0.02318682 | 0.2123376 | 0.10931621 | 0.14785821 | 0.35785385 | 0.11209194 | 0.03735536 |
| AGTTAAACACTTGCGA-1 | 3.17E-08 | 0.18429371 | 0.0774467 | 0.0004113 | 0.56777554 | 0.02495459 | 0.07964981 | 0.06546831 |
| AGTTCCTACAGAATTA-1 | 2.00E-05 | 0.03339978 | 0.03260189 | 1.01E-07 | 9.15E-07 | 0.72455919 | 0.12620932 | 0.08320876 |
| AGTTCCTATTTATGTT-1 | 1.42E-07 | 9.75E-09 | 0.12706802 | 1.08E-06 | 0.14886855 | 0.64694441 | 0.04546341 | 0.03165438 |
| AGTTTGCACCTGCCTC-1 | 7.76E-05 | 8.60E-07 | 3.18E-06 | 7.36E-07 | 1.94E-06 | 0.46112571 | 0.02766241 | 0.51112759 |
| ATAAACGGACCCGTAA-1 | 1.30E-05 | 4.60E-06 | 4.75E-05 | 2.44E-06 | 0.18494503 | 0.27648561 | 0.28994265 | 0.24855915 |
| ATAAAGGCTCGGTCGT-1 | 1.92E-08 | 0.21908329 | 0.09155809 | 1.52E-06 | 0.37569362 | 0.18559476 | 0.00039088 | 0.12767781 |
| ATAAGGTGGAGAACAT-1 | 0.00073316 | 0.00185174 | 6.57E-08 | 1.49E-06 | 2.77E-05 | 0.9970249 | 1.40E-07 | 0.00036075 |
| ATAAGTTACCGCGACG-1 | 1.06E-08 | 5.43E-05 | 0.01214629 | 0.00016235 | 0.2071183 | 0.28806129 | 0.23427655 | 0.25818092 |
| ATAATAGCTGTTGAAT-1 | 1.92E-06 | 0.06414449 | 1.74E-06 | 1.03E-06 | 0.83790323 | 0.00050201 | 0.09633783 | 0.00110775 |
| ATAATAGTGTAGGGAC-1 | 0.00961417 | 1.03E-08 | 0.01649785 | 1.82E-07 | 0.37017198 | 0.33040633 | 0.14821448 | 0.125095 |
| ATAATCTTGGAGAACC-1 | 0.00734393 | 1.52E-07 | 0.0143502 | 0.00017044 | 0.24207375 | 0.25894115 | 5.64E-07 | 0.47711981 |
| ATACAGGCCCTCCAAT-1 | 2.41E-07 | 8.70E-07 | 0.00034741 | 0.51190825 | 0.00180454 | 0.30452639 | 0.18139954 | 1.28E-05 |
| ATACCACGGGCAACTT-1 | 0.00072949 | 4.21E-07 | 0.17738402 | 7.95E-07 | 3.48E-06 | 0.43665955 | 0.20820484 | 0.1770174 |
| ATACGCCGGCGAAACC-1 | 1.07E-05 | 0.02537717 | 0.2418403 | 2.21E-06 | 0.06031617 | 0.21135135 | 0.25966222 | 0.20143991 |
| ATACGTACTTAGCCAC-1 | 0.07172542 | 1.48E-06 | 0.10586355 | 0.20502795 | 5.32E-05 | 0.60662608 | 0.01069755 | 4.80E-06 |
| ATACTGCCTTACACCG-1 | 4.00E-05 | 7.21E-09 | 3.72E-05 | 4.34E-07 | 8.21E-05 | 0.59849679 | 0.00020489 | 0.4011385 |
| ATAGACGAAGAGAAAG-1 | 1.73E-06 | 1.92E-08 | 0.16483533 | 2.15E-06 | 0.13245394 | 0.40080744 | 0.14215175 | 0.15974764 |
| ATAGAGTACTGGGACA-1 | 1.62E-06 | 1.78E-08 | 0.05553049 | 0.05163807 | 5.53E-05 | 0.63463173 | 0.06395701 | 0.19418576 |
| ATAGTGAAGCGTTCTC-1 | 5.06E-06 | 8.95E-07 | 0.05479975 | 5.11E-06 | 0.22412328 | 0.57666157 | 0.05762956 | 0.08677478 |
| ATATAAAGCGCTCGTG-1 | 7.50E-06 | 0.044143 | 0.07659251 | 1.61E-09 | 0.56034564 | 0.20264366 | 0.11626202 | 5.66E-06 |
| ATATAAATGTAGCTGC-1 | 8.93E-07 | 1.22E-06 | 1.60E-05 | 2.44E-05 | 8.82E-07 | 0.72693691 | 0.27301746 | 2.20E-06 |
| ATATCTTAGGGCCTTC-1 | 7.47E-09 | 5.32E-07 | 0.23973627 | 2.30E-06 | 0.09966724 | 0.37071221 | 0.09332124 | 0.19656021 |
| ATATTCCACATAGTGA-1 | 4.61E-07 | 0.18795759 | 0.00019175 | 0.09050487 | 0.71954004 | 0.00148436 | 0.00032017 | 7.68E-07 |
| ATATTGCTGTCAAAGT-1 | 5.39E-07 | 0.00609246 | 0.02616877 | 0.00024705 | 0.21525213 | 0.35100356 | 0.36038085 | 0.04085463 |
| ATATTTAACCCTCAAG-1 | 2.35E-08 | 0.03857905 | 0.01794681 | 0.00024345 | 0.37234172 | 0.31328255 | 0.24170909 | 0.01589731 |
| ATCAATCTGGGCTGCA-1 | 4.70E-07 | 0.13510232 | 0.152494 | 0.00248451 | 7.77E-05 | 0.4710612 | 0.05132751 | 0.18745229 |
| ATCAGCCTCATGCTGC-1 | 0.70798347 | 7.90E-06 | 0.09587855 | 1.74E-06 | 0.00027353 | 4.86E-07 | 0.02749554 | 0.16835878 |
| ATCATCCAATATTTGT-1 | 2.67E-05 | 6.06E-05 | 0.3043422 | 5.98E-07 | 4.83E-05 | 0.28805915 | 0.32374511 | 0.08371724 |
| ATCCAACGCAGTCATA-1 | 1.84E-08 | 0.03705853 | 0.00810759 | 3.75E-08 | 0.04734737 | 0.65846184 | 0.21020833 | 0.03881628 |
| ATCCACATCGACAGAA-1 | 0.00016225 | 3.40E-08 | 0.1382336 | 0.54772616 | 0.10107955 | 0.02430455 | 0.18849352 | 3.50E-07 |
| ATCCAGAGCAACAACC-1 | 8.99E-07 | 6.86E-08 | 1.18E-05 | 1.14E-06 | 0.26017123 | 0.08050017 | 0.25529406 | 0.40402061 |
| ATCCAGGATTCGTGAA-1 | 2.64E-07 | 2.04E-09 | 6.37E-05 | 0.01097803 | 0.12962742 | 0.68331746 | 0.13627249 | 0.03974066 |
| ATCCTACCTAAGCTCT-1 | 0.08245897 | 0.01406374 | 0.09546355 | 0.01757303 | 0.00074888 | 0.33867413 | 0.22071528 | 0.23030242 |
| ATCGACCCAATACAGA-1 | 6.26E-07 | 0.02267461 | 0.0443551 | 0.00018142 | 0.5016367 | 0.27047513 | 0.128574 | 0.03210242 |
| ATCGGAGACAGACGGC-1 | 6.31E-06 | 0.83575612 | 2.08E-05 | 3.55E-06 | 0.00400517 | 0.15906927 | 2.12E-05 | 0.0011176 |
| ATCTAATATCCTACGG-1 | 4.68E-06 | 0.01459706 | 0.16528918 | 0.03791131 | 9.50E-07 | 0.15939048 | 0.18695809 | 0.43584824 |
| ATCTTGACCTGCAACG-1 | 3.14E-08 | 0.08604411 | 0.06167923 | 2.11E-07 | 0.49230446 | 0.18382818 | 0.07060759 | 0.10553619 |
| ATGAAGCCAAGGAGCC-1 | 2.10E-08 | 0.03153965 | 0.02438162 | 5.01E-05 | 0.15655639 | 0.48214042 | 0.15902701 | 0.14630482 |
| ATGACTATGCGACATT-1 | 0.00177326 | 0.00193457 | 1.71E-06 | 0.0555041 | 4.50E-06 | 0.11735454 | 0.8234022 | 2.51E-05 |
| ATGAGGAGTGTTAATC-1 | 1.84E-07 | 0.00964315 | 0.11033786 | 2.92E-05 | 2.50E-07 | 0.7112134 | 0.08189825 | 0.08687767 |
| ATGATGCAATGGTACA-1 | 6.40E-06 | 8.20E-09 | 1.25E-08 | 2.10E-06 | 0.00190037 | 0.70854459 | 0.14558403 | 0.1439625 |
| ATGCACTACCGCATTG-1 | 2.77E-05 | 0.00564403 | 0.02145127 | 4.48E-07 | 0.62971225 | 0.23144408 | 0.07296695 | 0.03875332 |
| ATGCGACAGTCCCATT-1 | 3.44E-08 | 9.69E-07 | 0.15017689 | 0.12075733 | 1.90E-05 | 0.21366052 | 0.20048114 | 0.31490408 |
| ATGCTCAGTGTTGCAT-1 | 2.19E-06 | 0.05574769 | 0.06570772 | 2.38E-08 | 0.48687153 | 0.19908726 | 0.10881469 | 0.0837689 |
| ATGCTCTGGCGCGGTA-1 | 0.00150281 | 1.02E-06 | 0.00020245 | 9.95E-05 | 0.99137767 | 0.00676415 | 3.60E-06 | 4.87E-05 |
| ATGGAGCAGGCCGTGA-1 | 0.00017788 | 0.03689643 | 0.01836972 | 2.01E-06 | 0.24444437 | 0.49172023 | 1.52E-05 | 0.20837421 |
| ATGGTCGCGTGGTTTC-1 | 0.00511515 | 6.66E-09 | 1.76E-07 | 2.65E-08 | 0.00030885 | 0.68147923 | 0.30880501 | 0.00429155 |
| ATGTGGACATCTTGAT-1 | 2.69E-05 | 7.21E-05 | 2.88E-06 | 2.72E-06 | 0.37654399 | 0.62332513 | 2.63E-05 | 1.61E-08 |
| ATGTTACGAGCAATAC-1 | 9.32E-08 | 1.54E-06 | 0.04397899 | 5.37E-05 | 0.23565566 | 0.32015057 | 0.24480041 | 0.15535908 |
| ATTAAACATGCGGACC-1 | 2.91E-05 | 0.00018431 | 0.0040212 | 0.00077949 | 0.40182348 | 0.46759785 | 0.06448324 | 0.06108134 |
| ATTAGGCGATGCTTTC-1 | 5.88E-05 | 2.40E-05 | 0.0903243 | 4.56E-07 | 4.53E-07 | 0.47835409 | 0.43123762 | 3.21E-07 |
| ATTCACTGATGTTGGA-1 | 4.59E-09 | 1.46E-06 | 0.36786464 | 9.00E-07 | 1.96E-06 | 0.34274987 | 0.15489198 | 0.13448917 |
| ATTCAGTAGCAGGGTC-1 | 8.46E-09 | 0.03979184 | 0.08552197 | 3.02E-07 | 9.07E-06 | 0.72502624 | 0.03500234 | 0.11464823 |
| ATTCATATACTGTCCA-1 | 5.09E-07 | 3.03E-07 | 1.65E-05 | 0.0971261 | 0.05450622 | 0.47131283 | 0.11737278 | 0.25966475 |
| ATTCATCGTTGAGGCA-1 | 0.00020176 | 3.97E-06 | 5.77E-06 | 2.27E-05 | 7.97E-07 | 0.99973996 | 2.51E-05 | 7.22E-09 |
| ATTCCCACATAAACAA-1 | 7.21E-07 | 2.21E-06 | 0.08274896 | 6.37E-07 | 0.15773332 | 0.50050033 | 0.18282535 | 0.07618846 |
| ATTCCTCCGCCAGTGC-1 | 1.24E-07 | 0.07359499 | 0.01853775 | 1.44E-08 | 0.41999624 | 0.38371691 | 0.01987341 | 0.08428055 |
| ATTCGACGCCGGGCCT-1 | 2.29E-07 | 0.06637396 | 0.06504217 | 0.00012269 | 0.07808206 | 0.32803299 | 0.29920281 | 0.1631431 |
| ATTGAAGATCTTAGTG-1 | 2.98E-08 | 1.56E-08 | 0.0474859 | 3.79E-06 | 0.25087066 | 0.53617483 | 0.14036486 | 0.02509991 |
| ATTGCCTTTATGTTTG-1 | 2.06E-05 | 0.0292226 | 0.02594213 | 2.30E-06 | 5.67E-05 | 0.73037844 | 3.49E-07 | 0.2143769 |
| ATTGCTGCTCCTCCAT-1 | 4.68E-08 | 0.10131585 | 0.04621359 | 0.00868955 | 0.06897493 | 0.59464161 | 0.07915963 | 0.1010048 |
| ATTTACAGTTTACTGG-1 | 8.14E-09 | 0.03290737 | 0.01081966 | 2.19E-07 | 4.26E-05 | 0.61177146 | 0.21696537 | 0.12749333 |
| CAAACGGTCGCACTTT-1 | 4.26E-06 | 6.83E-08 | 0.08271221 | 5.71E-07 | 7.03E-05 | 0.73110591 | 0.07331492 | 0.11279175 |
| CAACGGTTCTTGATAC-1 | 5.18E-07 | 6.32E-06 | 0.0440399 | 2.46E-08 | 0.09213018 | 0.59840376 | 0.19957931 | 0.06583998 |
| CAAGAGGGCGGAGTAC-1 | 3.38E-05 | 1.64E-06 | 7.73E-08 | 0.09010915 | 2.85E-05 | 0.00044343 | 0.90577537 | 0.00360805 |
| CAAGATATTATAACGT-1 | 1.78E-06 | 7.74E-06 | 0.04466142 | 0.00029942 | 0.43120711 | 0.11961408 | 7.64E-08 | 0.40420836 |
| CAAGCAACGTCGGAGT-1 | 8.67E-09 | 1.41E-05 | 0.05520473 | 7.45E-07 | 0.25186233 | 0.61804026 | 0.07212637 | 0.00275143 |
| CAAGCGGCACATAATT-1 | 0.19221101 | 0.00184523 | 0.00284519 | 0.11137256 | 0.04189413 | 0.16261178 | 0.09311718 | 0.39410291 |
| CAAGGATCGCATGTTC-1 | 1.92E-07 | 1.96E-07 | 1.42E-08 | 3.62E-05 | 0.00140196 | 0.68332455 | 0.22725577 | 0.08798109 |
| CAATGCGAGAAGTATC-1 | 0.00074695 | 0.00098725 | 0.00013271 | 1.05E-05 | 5.73E-05 | 0.99802163 | 4.30E-06 | 3.93E-05 |
| CAATTTCGTATAAGGG-1 | 1.76E-05 | 2.13E-05 | 2.15E-05 | 2.38E-05 | 0.43266398 | 0.19655155 | 0.19250927 | 0.17819092 |
| CACAATGAGCTGCTAT-1 | 3.20E-06 | 1.60E-07 | 0.04479887 | 1.30E-05 | 0.03040986 | 0.62052456 | 0.07179476 | 0.23245557 |
| CACACAGGGATAGATT-1 | 4.05E-08 | 0.02525716 | 0.0774856 | 1.83E-06 | 0.20735702 | 0.24304316 | 0.1967065 | 0.25014868 |
| CACAGCACCCACGGCA-1 | 4.18E-08 | 0.03911513 | 0.07318643 | 1.97E-06 | 0.08976227 | 0.47263582 | 0.3006174 | 0.02468094 |
| CACATATTAGCAGGAT-1 | 0.00029883 | 7.69E-05 | 8.21E-08 | 3.85E-07 | 0.00040264 | 0.99921431 | 1.32E-07 | 6.76E-06 |
| CACATCTCACCGACGA-1 | 9.76E-08 | 1.46E-05 | 0.67272223 | 9.49E-07 | 0.32197665 | 0.00131627 | 0.0039663 | 2.85E-06 |
| CACATGATTCAGCAAC-1 | 3.47E-06 | 0.02219208 | 0.000201 | 3.65E-07 | 0.30159906 | 0.39202362 | 0.27965005 | 0.00433035 |
| CACCCTAACAAGATCT-1 | 7.12E-06 | 4.17E-05 | 0.99925554 | 0.00063484 | 1.82E-06 | 2.37E-07 | 1.89E-05 | 3.99E-05 |
| CACCTAATAGAGTCGT-1 | 0.00012717 | 9.35E-05 | 0.00034881 | 1.80E-07 | 0.47109904 | 0.23138756 | 0.21748892 | 0.07945484 |
| CACGAAAGTTAGTCCC-1 | 0.00795899 | 2.42E-08 | 0.04574919 | 5.16E-07 | 0.3683523 | 0.33421465 | 0.12423172 | 0.11949261 |
| CACGCAGCGAGGCTTT-1 | 0.00029987 | 1.66E-05 | 0.09726073 | 1.19E-07 | 1.34E-05 | 0.46967865 | 0.20837332 | 0.22435736 |
| CACTAAAGTTGCCTAT-1 | 1.81E-07 | 9.49E-10 | 0.1410727 | 4.47E-07 | 0.29991031 | 0.29982815 | 0.16912718 | 0.09006103 |
| CACTCAAGAGCTATGG-1 | 6.63E-08 | 1.26E-07 | 0.11287001 | 1.53E-05 | 0.12288909 | 0.61187278 | 0.08768714 | 0.0646655 |
| CACTCGAGCTGAACAA-1 | 3.14E-07 | 1.54E-07 | 0.001417 | 0.15699276 | 0.00053118 | 0.05414401 | 0.76849449 | 0.0184201 |
| CACTTAATCAGACGGA-1 | 3.57E-09 | 8.88E-06 | 0.08341189 | 2.30E-05 | 8.74E-05 | 0.65338543 | 0.19662249 | 0.0664609 |
| CACTTCGCCACAGGCT-1 | 1.09E-07 | 0.02278277 | 0.03601539 | 0.07793837 | 2.91E-09 | 0.72717875 | 0.07715729 | 0.05892731 |
| CAGAACTTAGCCCTCT-1 | 0.00063141 | 4.40E-07 | 1.93E-07 | 0.79119349 | 0.00157879 | 0.00503434 | 1.15E-07 | 0.20156123 |
| CAGAGACGGTCACCCA-1 | 9.60E-07 | 3.72E-07 | 0.0051135 | 0.17425359 | 0.08719784 | 0.16294878 | 0.13266414 | 0.43782082 |
| CAGATACTAACATAGT-1 | 4.12E-08 | 1.28E-08 | 0.04689064 | 2.27E-05 | 0.46451694 | 0.24564035 | 0.10689163 | 0.13603769 |
| CAGCAGTCCAGACTAT-1 | 0.12499502 | 0.12498747 | 0.12499874 | 0.12500131 | 0.12498262 | 0.12501161 | 0.12501161 | 0.12501161 |
| CAGCTCACTGAGACAT-1 | 0.00263473 | 0.00861302 | 0.03123673 | 8.74E-07 | 0.26128167 | 0.35841235 | 0.11626412 | 0.2215565 |
| CAGCTTAGTAGGTAGC-1 | 1.08E-06 | 0.00438543 | 4.27E-06 | 4.85E-06 | 0.20270298 | 0.41745364 | 0.20347013 | 0.17197761 |
| CAGGATATATCGTTGT-1 | 4.03E-07 | 0.02111516 | 0.01288278 | 0.13076906 | 0.12994301 | 0.48591677 | 0.04880442 | 0.1705684 |
| CAGGCAGTCTTACCAG-1 | 1.10E-07 | 5.37E-06 | 0.02349613 | 1.63E-05 | 7.80E-06 | 0.97042684 | 0.00604734 | 1.06E-07 |
| CAGGCCGTTTGGGTGT-1 | 4.57E-08 | 1.13E-05 | 0.28992765 | 4.90E-05 | 3.79E-07 | 0.32577201 | 0.29038581 | 0.0938538 |
| CAGGCGCCATGCTAGG-1 | 2.66E-05 | 9.80E-07 | 6.70E-07 | 0.00031638 | 2.58E-07 | 0.13988154 | 0.85969455 | 7.90E-05 |
| CAGTAATCCCTCCCAG-1 | 2.32E-08 | 0.04378223 | 0.18102094 | 1.05E-07 | 0.20697326 | 0.28360733 | 0.13330011 | 0.15131602 |
| CAGTCTGTATACTGGG-1 | 3.09E-06 | 7.61E-07 | 0.00972976 | 0.00183303 | 0.44937196 | 0.35042611 | 0.1381238 | 0.05051149 |
| CAGTTCAAATTGACAC-1 | 9.72E-09 | 0.00369737 | 0.11052565 | 6.57E-07 | 5.45E-05 | 0.62631612 | 0.19881028 | 0.06059537 |
| CAGTTCCGCGGGTCGA-1 | 1.51E-07 | 0.01181494 | 0.1099591 | 0.16899549 | 0.16447694 | 0.25438078 | 0.12583606 | 0.16453654 |
| CATAAGAAGCTTGGCT-1 | 4.54E-07 | 2.74E-06 | 0.16126683 | 0.00021154 | 0.71647099 | 0.00036255 | 0.12091611 | 0.00076878 |
| CATACGGCGTCTGGGC-1 | 3.26E-07 | 0.28760862 | 8.39E-08 | 1.90E-06 | 0.16230356 | 0.45506611 | 0.00017188 | 0.09484751 |
| CATACTATGTAATTGT-1 | 3.36E-07 | 1.07E-07 | 0.13084525 | 0.0001079 | 7.75E-06 | 0.4985624 | 0.30855033 | 0.06192592 |
| CATAGCCGCCCGGGAT-1 | 1.96E-09 | 4.71E-05 | 0.09649157 | 1.29E-07 | 0.14354583 | 0.54738325 | 0.16321297 | 0.04931915 |
| CATCGGACGGGTTAAT-1 | 2.11E-06 | 0.05918312 | 0.12945042 | 2.10E-08 | 0.24539754 | 0.48365769 | 0.01439614 | 0.06791295 |
| CATGAGATGCACTCTC-1 | 1.37E-08 | 0.08248508 | 0.41470512 | 0.01338816 | 0.48104736 | 0.00704667 | 2.09E-06 | 0.00132552 |
| CATGGGTATGCCTTAT-1 | 0.22497144 | 0.19056589 | 0.5840373 | 5.67E-05 | 0.00014107 | 0.00021461 | 2.45E-06 | 1.06E-05 |
| CATGGTAAGTAGCGTT-1 | 0.02478825 | 1.81E-08 | 0.1454249 | 0.00035555 | 0.53673659 | 0.18855294 | 0.10413515 | 6.60E-06 |
| CATGTCTCATTTATGG-1 | 0.00028122 | 0.00076602 | 0.00225384 | 0.00060702 | 6.29E-09 | 0.97895034 | 0.01714057 | 9.87E-07 |
| CATTATGCTTGTTGTG-1 | 1.40E-06 | 3.13E-06 | 0.10440496 | 5.35E-08 | 0.6211575 | 0.15822241 | 3.30E-06 | 0.11620724 |
| CATTTCTAGCAGACTA-1 | 2.79E-08 | 0.00071634 | 0.0276839 | 5.02E-08 | 0.59569743 | 0.18826814 | 0.10898147 | 0.07865265 |
| CCAAACAGAACCCTCG-1 | 9.93E-06 | 2.09E-05 | 0.06067573 | 1.42E-06 | 0.39315117 | 0.33350917 | 0.14549275 | 0.06713895 |
| CCAACGATGCACTGAT-1 | 3.24E-05 | 0.0033262 | 0.04534714 | 1.28E-05 | 0.03634015 | 0.67002637 | 0.04435159 | 0.20056341 |
| CCAAGCGTAACTCGTA-1 | 0.16606471 | 9.58E-08 | 0.10043683 | 0.08745381 | 0.00359503 | 0.15540051 | 0.20991794 | 0.27713107 |
| CCAATAGTGCCGTCGA-1 | 3.42E-08 | 4.10E-08 | 0.20233803 | 4.34E-05 | 0.00110797 | 0.50394665 | 0.17739531 | 0.11516857 |
| CCAATGTCACAGCAAG-1 | 2.62E-07 | 0.00757355 | 0.07161137 | 6.17E-06 | 0.20600183 | 0.55804732 | 0.09440831 | 0.06235119 |
| CCAATTGAATGTTAAT-1 | 6.28E-09 | 0.06030569 | 0.10722255 | 0.00419816 | 0.0008874 | 0.50103731 | 0.18016896 | 0.14617992 |
| CCACACTGAGATATTA-1 | 1.02E-07 | 6.09E-07 | 0.24460774 | 4.81E-07 | 0.08356261 | 0.22873466 | 0.21999151 | 0.22310229 |
| CCAGCCTGGACCAATA-1 | 1.42E-08 | 1.59E-09 | 0.06618317 | 6.58E-06 | 0.35826411 | 0.50209053 | 0.00916949 | 0.06428611 |
| CCAGGGACGTGGCCTC-1 | 1.31E-07 | 2.03E-08 | 0.04790057 | 2.20E-05 | 0.31837371 | 0.43579985 | 0.14330851 | 0.05459521 |
| CCATCGCAGTTAAACT-1 | 0.00022568 | 0.45635085 | 0.13085473 | 3.54E-05 | 0.17748547 | 0.01476917 | 0.10236965 | 0.11790909 |
| CCATGCCTGTTTAGTA-1 | 0.02909921 | 6.92E-05 | 0.03584456 | 0.01295505 | 0.15942527 | 0.48736193 | 4.50E-05 | 0.27519973 |
| CCATGCTCTGCAGGAA-1 | 4.63E-06 | 2.45E-06 | 0.07332914 | 6.02E-05 | 0.0228431 | 0.49145017 | 0.14805331 | 0.26425704 |
| CCATGGCCCTTGTACC-1 | 6.41E-05 | 4.61E-05 | 0.06956589 | 0.02128775 | 0.33261561 | 0.38407246 | 0.15289195 | 0.03945617 |
| CCATTAGCGATAATCC-1 | 4.14E-07 | 0.03129456 | 0.06464935 | 6.23E-07 | 0.51204169 | 0.16148012 | 0.05272117 | 0.17781208 |
| CCATTCCCTGCCCACA-1 | 2.99E-08 | 0.01141961 | 0.10025611 | 3.19E-05 | 0.12542959 | 0.41457795 | 0.20128237 | 0.14700239 |
| CCATTTCTACCTATTA-1 | 0.47601957 | 4.27E-08 | 0.01038924 | 0.00678162 | 0.15769839 | 0.20812171 | 0.03375681 | 0.10723262 |
| CCCAGTTAAGGCGCCG-1 | 2.83E-09 | 0.02073973 | 0.0356594 | 3.47E-07 | 0.30658733 | 0.52751262 | 0.08213885 | 0.02736172 |
| CCCGCAGCGCGAACTA-1 | 0.35328008 | 1.33E-07 | 1.38E-07 | 9.12E-07 | 0.23763032 | 0.14661688 | 0.16441966 | 0.09805188 |
| CCCGCCATGCTCCCGT-1 | 1.01E-08 | 0.00957596 | 0.00883537 | 7.44E-07 | 0.35755608 | 0.3544222 | 0.12498325 | 0.14462638 |
| CCCGTCAGCGTCTGAC-1 | 2.06E-08 | 1.44E-06 | 0.07248955 | 0.00080612 | 0.04532889 | 0.5504098 | 0.24889142 | 0.08207277 |
| CCCTGAAATGAGTTGA-1 | 5.88E-09 | 0.01039791 | 0.06102861 | 2.14E-05 | 0.22885049 | 0.39026334 | 0.19498929 | 0.11444899 |
